# Supplementary material for: The antibacterial activity of p-tert-butylcalix[6]arene and its effect on a membrane model: molecular dynamics and Langmuir film studies
Source: Royal Society of Chemistry journal article supplement (doi:10.1039/d0cp00432d), 2020-01-01
Supplement: d0cp00432d1.pdf [file d0cp00432d1.pdf]

**Study of the antibacterial activity of *para-tert-*  
butylcalix[6]arene and its effect on a membrane model:  
Molecular Dynamics and Langmuir films studies**

*Ellen C. Wrobel,<sup>a</sup> Lucas S. de Lara,<sup>b</sup> Taiza A. S. do Carmo,<sup>c</sup> Patrícia Castellen,<sup>a</sup> Márcio Lazzarotto,<sup>d</sup> Sérgio R. de Lázaro,<sup>a</sup> Alexandre Camilo Jr,<sup>b</sup> Luciano Caseli,<sup>e</sup> Rolf Schmidt,<sup>f</sup> Christine E. DeWolf,<sup>f</sup> Karen Wohnrath<sup>a\*</sup>*

<sup>a</sup>Department of Chemistry, Universidade Estadual de Ponta Grossa, Ponta Grossa, Paraná 84030-900, Brazil.

<sup>b</sup>Department of Physics, Universidade Estadual de Ponta Grossa, Ponta Grossa, Paraná 84030-900, Brazil.

<sup>c</sup>Academic Department of Mathematic, Universidade Federal Tecnológica do Paraná – Campus Ponta Grossa, Ponta Grossa, Paraná 84016-210, Brazil.

<sup>d</sup>Department of Organic Chemistry, Universidade Federal do Rio Grande do Sul, Porto Alegre, Rio Grande do Sul 91501-970, Brazil.

<sup>e</sup>Instituto de Ciências Ambientais, Químicas e Farmacêuticas, Universidade Federal de São Paulo, Diadema, São Paulo (SP) 09972-970, Brazil.

<sup>f</sup>Department of Chemistry and Biochemistry and Concordia Centre for NanoScience Research, Concordia University, 7141 Sherbrooke Street West, Montreal, Québec H4B 1R6, Canada.

**KEYWORDS:** calixarene, DPPG, membrane model, antibacterial activity, aggregation, Langmuir films, mixed monolayers, Molecular dynamic.

\* Corresponding author. Tel: +55-42-32203731; fax: +55-42-32203042.

e-mail: [karen.woh@gmail.com](mailto:karen.woh@gmail.com)

## Data analysis for Thermodynamic Parameters

The excess area parameter ( $\Delta A^E$ ) values at a given surface pressures were calculated (Eq. (1)) in order to determine the effect of *Calix6* on the lipid monolayer.<sup>1</sup>

$$\Delta A^E = A_{exp} - A_{12} \quad (1)$$

The interactions between the *Calix6* and DPPG molecules in the binary systems were quantitatively analyzed by the excess free energy ( $\Delta G^E$ )<sup>2</sup> calculated, according to Eq. (2).

$$\Delta G^E = \int_0^\pi [A_{exp} - A_{12}] d\pi \quad (2)$$

Ideally mixed or immiscible monolayers exhibit  $\Delta G^E=0$ . Negative values of  $\Delta G^E$  are consistent with attractive interactions in the mixed films, i.e., the mixture is thermodynamically more favorable than the separation between respective components and the interactions are energetically more favored than in an ideal mixture. While, positive values of  $\Delta G^E$  indicate phase separation and/or repulsion in the mixed monolayer, i.e., the interactions between the molecules are weaker than those in the respective pure films.<sup>3,4</sup>

Gibbs energy of mixing ( $\Delta G^M$ ), based on Eq. (3) and (4), was calculated in order to quantitatively analyze the stability of the mixed monolayers.

$$\Delta G^M = \Delta G^E + \Delta G^{ID} \quad (3)$$

$$\Delta G^{ID} = RT (X_1 \ln X_1 + X_2 \ln X_2) \quad (4)$$

where  $\Delta G^{ID}$  is the Gibbs energy of ideal mixing, which involves entropy terms,<sup>5</sup>  $X_1$  and  $X_2$  denote the mole fraction of the components in mixture,  $R$  is the gas constant ( $8.31451 \text{ J K}^{-1} \text{ mol}^{-1}$ ) and  $T$  is the temperature in Kelvin.

Thermodynamic parameters reveal the intermolecular interactions and the magnitude of the interaction forces, which can be analyzed in more detail,<sup>2-4</sup> as discussed below. According to the regular solution theory (RST),<sup>2-4</sup> the activity coefficient  $f_j$  is given by Eq. (5).<sup>2</sup>

$$\ln f_1 = \frac{\omega (1 - X_1)^2}{RT} \quad \ln f_2 = \frac{\omega (1 - X_2)^2}{RT} \quad (5)$$

where  $f_1$  and  $f_2$  represent the activity coefficients for the components in mixture (with corresponding mole fractions,  $X_1$  and  $X_2$ ) and  $\omega$  is the exchanging energy, which is ascribed to cohesive forces between unlike molecules,<sup>4</sup> calculated from Eq. (6).

$$\omega = \frac{\Delta G^E}{X_1 X_2} \quad (6)$$

The interaction parameter was calculated according to Eq. (7), and the magnitude of the  $I_p$  values depended on  $\Delta G^E$ , where larger negative values of  $I_p$  correspond to stronger interactions.<sup>3,4</sup>

$$I_p = \frac{\omega}{RT} \quad (7)$$

## Classic Molecular Dynamic (MD)

Water solution was simulated by using the SPCE/FH model,<sup>6</sup> and the force fields between water molecules as well as water-N<sub>2</sub>/O<sub>2</sub> (gas) interactions were also

detailed. A pattern of 80290 molecules of water, 176 of N<sub>2</sub> and 56 of O<sub>2</sub> was used for simulating water phase and air phase, respectively. The air phase was defined as two Lennard–Jones sites connected with a rigid bond.<sup>7</sup> *Calix6* molecular geometry was optimized as described in our previous work<sup>8</sup> using CVFF.<sup>9,10</sup> For DPPG molecule the MD calculations were carried out using CHARMM27 (the force field parameters used here are detailed below, in the Table S1, S2 and S3). The convergence criteria for the minimization process was set at 0.001 kcal Å<sup>-1</sup> mol<sup>-1</sup>.

Besides the individual components (air, water and monolayers), (1) air/water, (2) water/*Calix6*, (3) *Calix6*/air, (4) water/DPPG, (5) DPPG/air and (6) DPPG:*Calix6* planar interfaces were simulated, which were simulated with a box set to the dimensions  $L_x \times L_y \times L_z$ , where  $L_x = 12.0$  nm,  $L_y = 24.0$  nm and  $L_z = 8.0$  nm (except for the system air/water, where  $L_z = 10.0$  nm). A sequence of NVE (a 1.0 ps run), NVT (a 10.0 ps run) and NPT (a 20.0 ns) calculations were carried out to obtain the thermodynamic properties in equilibrium for each system at 300 K and 1 atm.<sup>8</sup> Periodic boundary conditions have been applied. For long-range electrostatic interactions, the reciprocal PPPM method<sup>8,11-13</sup> was adopted.

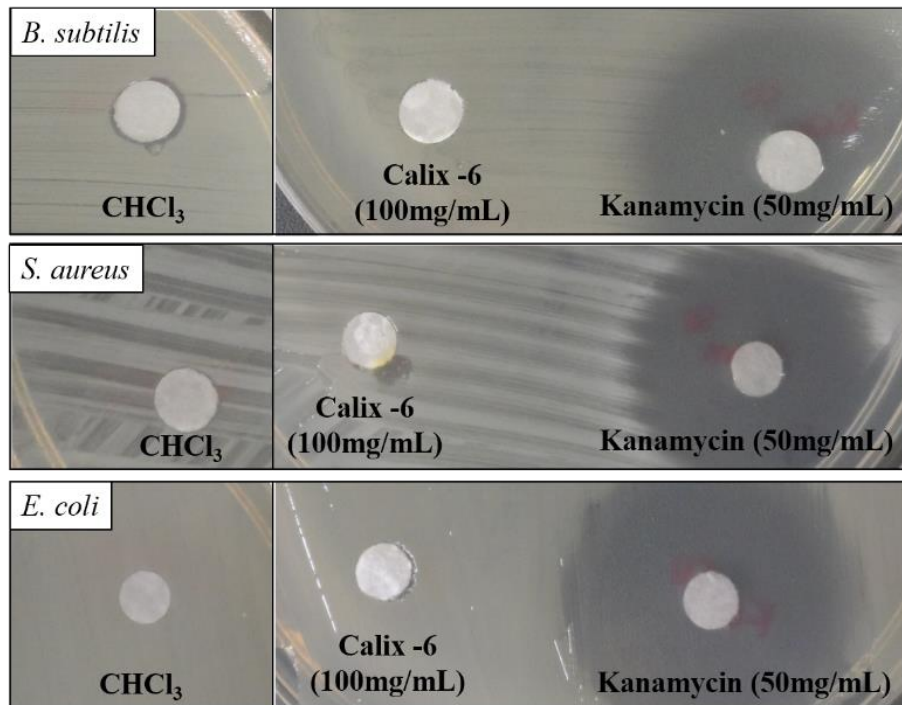

**Figure S1.** Disc diffusion tests with *Calix6* (100mg mL<sup>-1</sup>). Gram-negative *E. coli* strain and Gram-positive *S. aureus* and *B. subtilis* strains were incubated in the presence of chloroform, *Calix6* diluted in chloroform and Kanamycin.

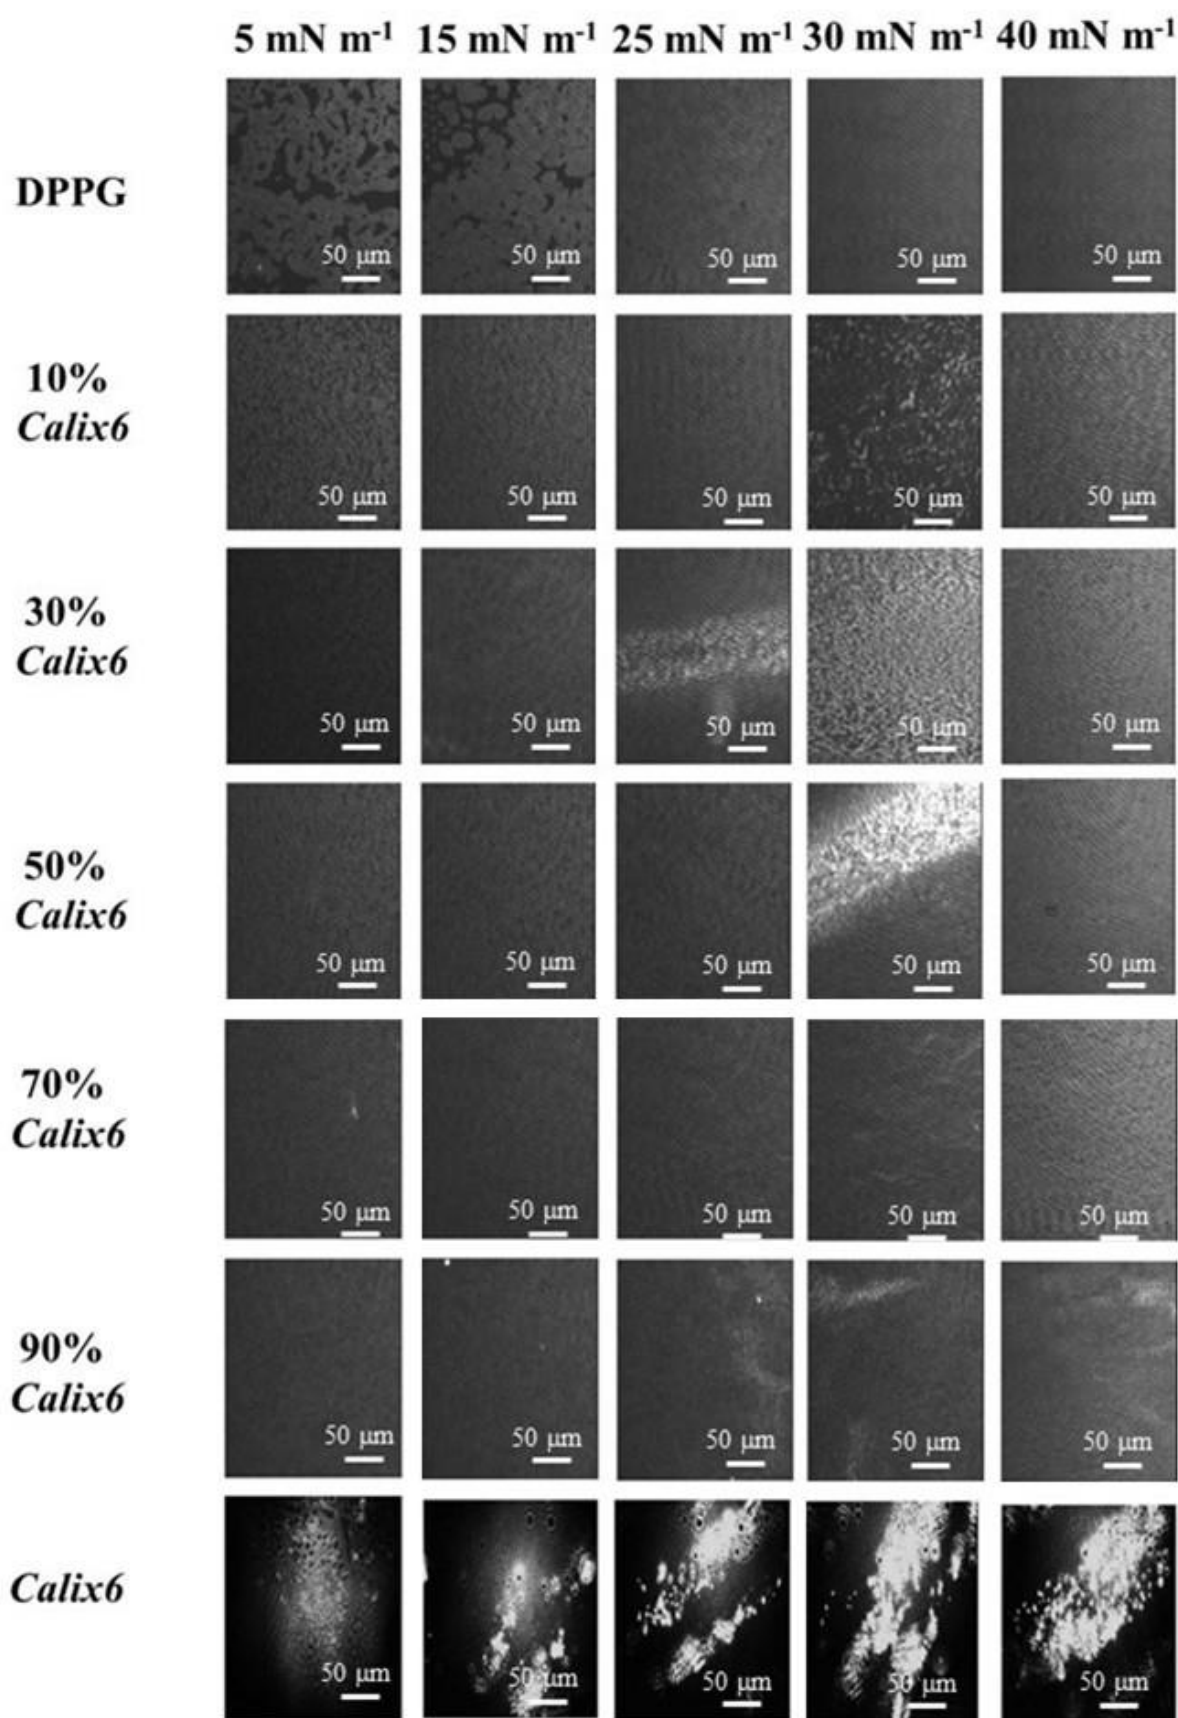

**Figure S2.** BAM images (width 220  $\mu\text{m}$ ) for the DPPG monolayers containing several *Calix6* molar ratios (0, 0.1, 0.3, 0.5, 0.7, 0.9 and 1), at  $\pi = 5, 15, 25, 30$  and  $40 \text{ mN m}^{-1}$ .

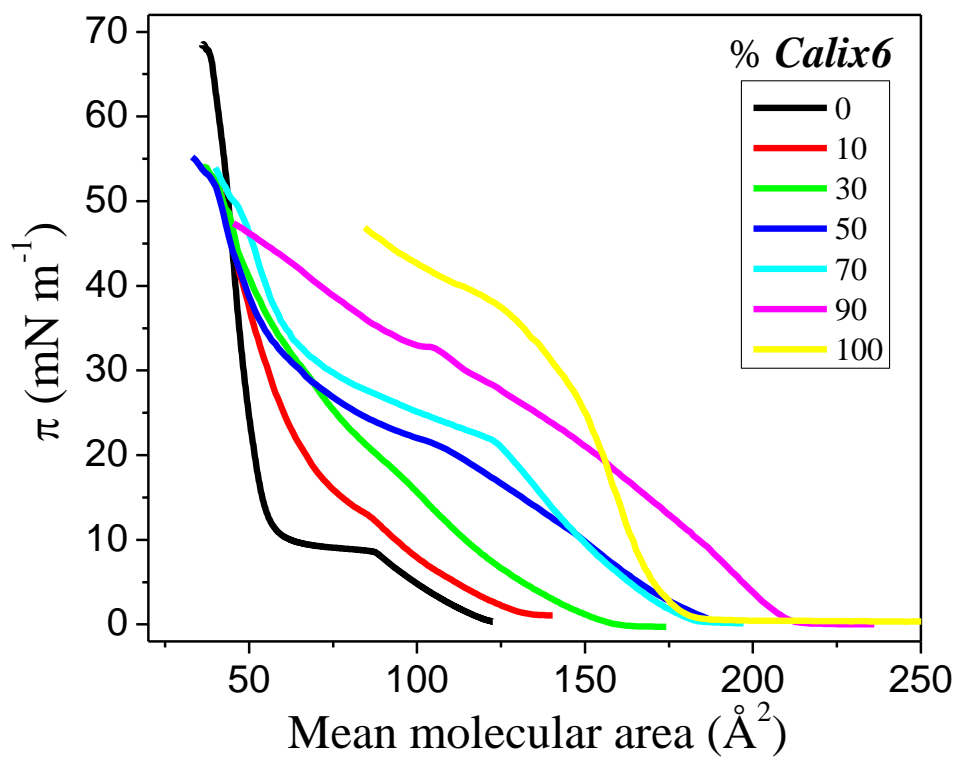

**Figure S3.** (a) Surface pressure-area isotherms for mixed DPPG:*Calix6* monolayers on PBS buffer, pH = 7.4, for various mole percent of *Calix6*. The area per molecule was calculated assuming that molecules of both DPPG and *Calix6* remain at the interface, and therefore, it is not an area per calixarene molecule.

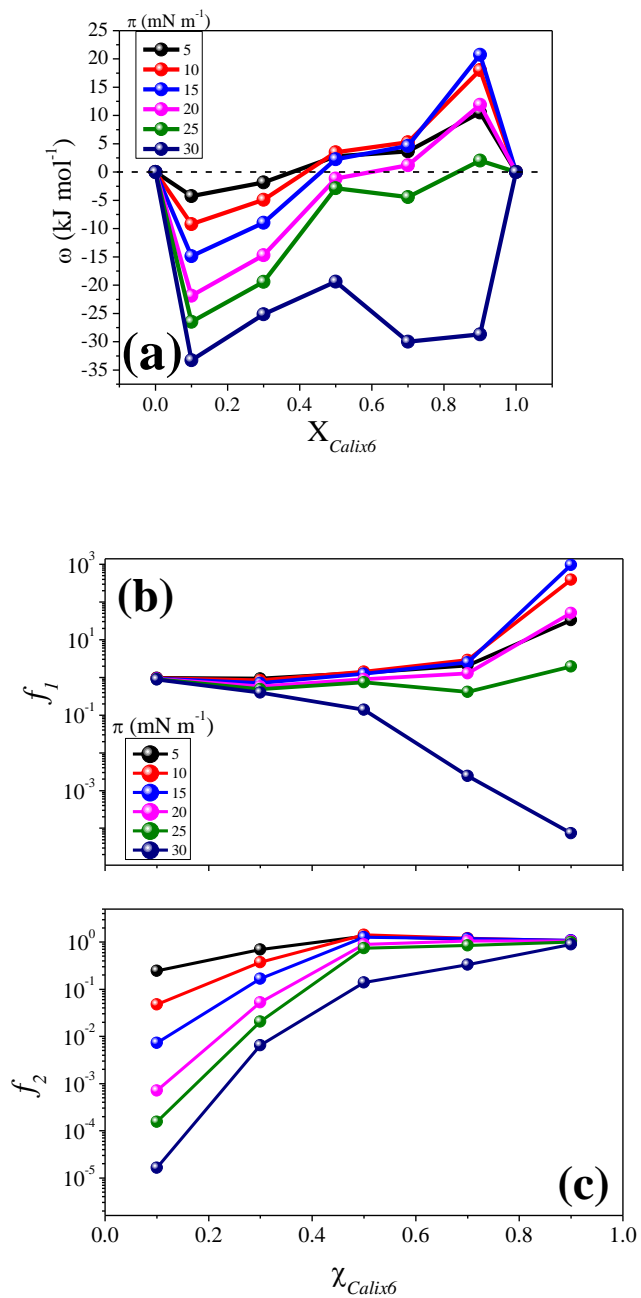

**Figure S4.** Thermodynamic analysis of (a) exchanging energy, and (b)  $f_1$  and (c)  $f_2$  activity coefficients as a function of molar ratio of *Calix6* for mixed DPPG/*Calix6* monolayers at  $\pi = 5\text{-}30 \text{ mN m}^{-1}$ .

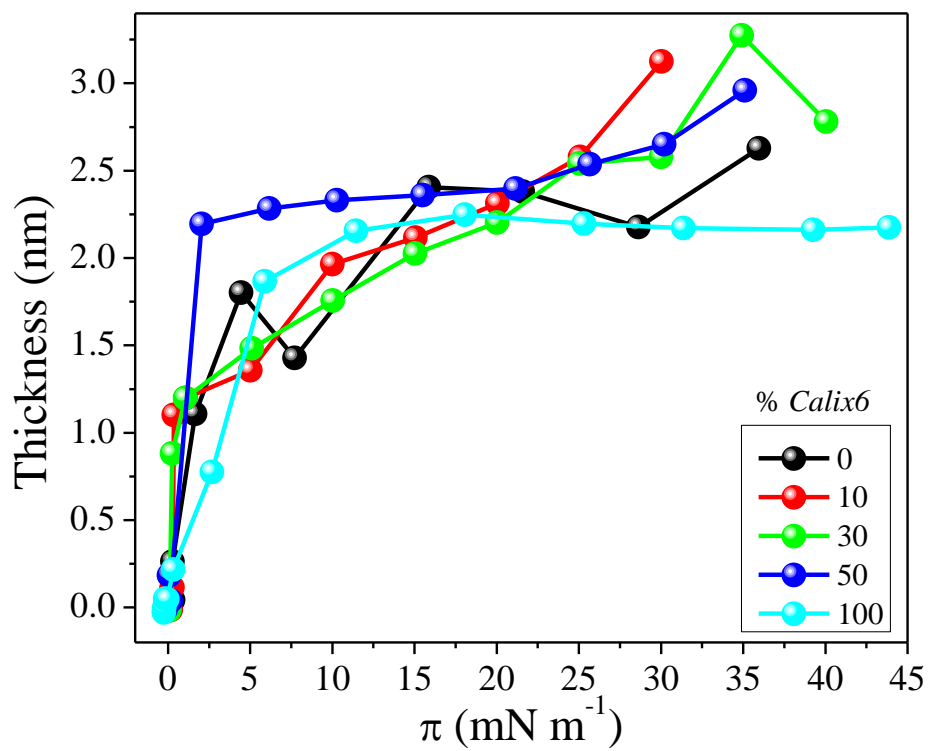

**Figure S5.** Average thickness for the DPPG/*Calix6* monolayers at the air-water interface, for several *Calix6* molar ratios at different surface pressures, obtained by ellipsometry and fit using a simple box model.



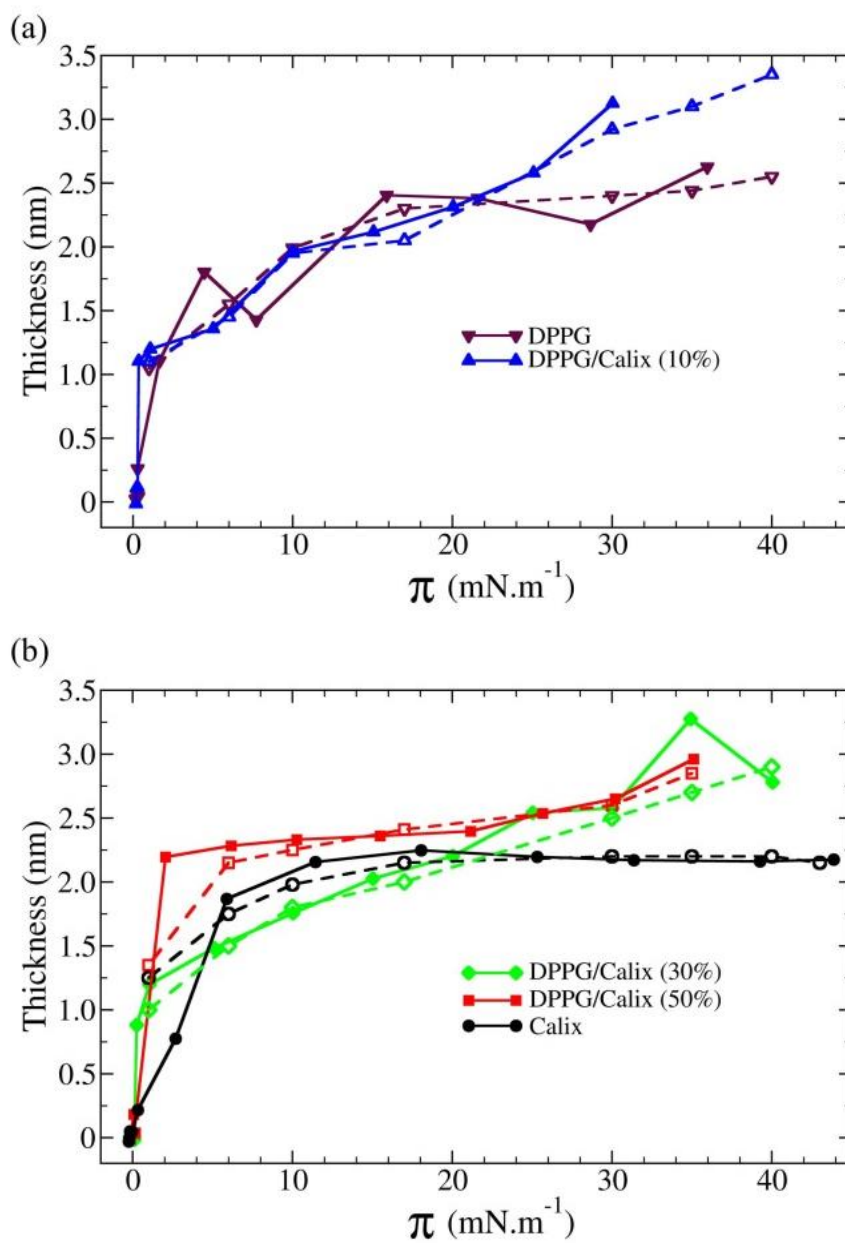

**Figure S6.** Comparison between the experimental and theoretical thickness values for the DPPG/*Calix6* monolayers on aqueous subphase; full and dotted lines are the experimental and MD results, respectively.

**Table S1.** Potential parameters for fluids

| <b>Parameters of SPC-FH water model</b> |                                              |                   |           |
|-----------------------------------------|----------------------------------------------|-------------------|-----------|
| Site                                    | $\epsilon_{ii}$ ( $\times 10^{-2}$ kcal/mol) | $\sigma_{ii}$ (Å) | $q_i$ (e) |
| O                                       | 15.525                                       | 3.188             | -0.8476   |
| H                                       | 3.965                                        | 0.650             | 0.4238    |

  

| <b>Intramolecular parameters</b> |                                  |                                         |                       |
|----------------------------------|----------------------------------|-----------------------------------------|-----------------------|
|                                  | $k_b$ (kcal/mol/Å <sup>2</sup> ) | $k_\theta$ (kcal/mol/rad <sup>2</sup> ) | $\theta-\theta_0$ (°) |
| O-H                              | 553.92                           | 45.74                                   | 109.4                 |

  

| <b>Parameters of N<sub>2</sub> and O<sub>2</sub> gas</b> |                                              |                   |           |
|----------------------------------------------------------|----------------------------------------------|-------------------|-----------|
| Site                                                     | $\epsilon_{ii}$ ( $\times 10^{-2}$ kcal/mol) | $\sigma_{ii}$ (Å) | $q_i$ (e) |
| N                                                        | 16.700                                       | 3.320             | -         |
| O                                                        | 22.800                                       | 2.990             | -         |

**Table S2.** Topology and Potential parameters for *Calix6* dimer by LAMMPS style and according to the *Calix6* model.

#### LAMMPS Calix 6 # units – real

156 atoms  
162 bonds  
294 angles

7 atom types  
9 bond types  
13 angle types

0.0000 40.0000 xlo xhi  
0.0000 40.0000 ylo yhi  
0.0000 40.0000 zlo zhi

#### Masses

1 12.011150  
2 12.011150  
3 15.999400  
4 12.011150  
5 12.011150  
6 1.007970  
7 1.007970

#### Pair Coeffs # pair style Lennard-Jones

1 0.14799 3.61704  
2 0.03899 3.87540  
3 0.22800 2.85978  
4 0.15999 3.47450  
5 0.03899 3.87540  
6 0.03800 2.44997  
7 0.03800 2.44997

#### Bond Coeffs # bond style Harmonic

1 384.0000 1.3700  
2 480.0000 1.3400  
3 283.0924 1.5100  
4 363.4164 1.0800  
5 283.0924 1.5100  
6 340.6175 1.1050  
7 540.6336 0.9600  
8 322.7158 1.5260  
9 340.6175 1.1050

#### Angle Coeffs # angle style Harmonic

1 60.0000 120.0000  
2 90.0000 120.0000  
3 44.2000 120.0000  
4 37.0000 120.0000

|    |         |          |
|----|---------|----------|
| 5  | 44.2000 | 120.0000 |
| 6  | 44.4000 | 110.0000 |
| 7  | 46.6000 | 110.5000 |
| 8  | 39.5000 | 106.4000 |
| 9  | 50.0000 | 109.0000 |
| 10 | 46.6000 | 110.5000 |
| 11 | 46.6000 | 110.5000 |
| 12 | 44.4000 | 110.0000 |
| 13 | 39.5000 | 106.4000 |

**Atoms # (atom, molecule, type, charge, x, y, z)**

|    |   |   |           |               |              |               |
|----|---|---|-----------|---------------|--------------|---------------|
| 1  | 0 | 1 | 0.030000  | -15.841334332 | 21.162318207 | -17.359423749 |
| 2  | 0 | 1 | 0.000000  | -15.841334332 | 21.162318207 | -15.949423783 |
| 3  | 0 | 1 | -0.100000 | -14.619334329 | 21.162318207 | -15.282423847 |
| 4  | 0 | 1 | 0.000000  | -13.407334316 | 21.154318207 | -15.970423691 |
| 5  | 0 | 1 | -0.100000 | -13.430334318 | 21.236318208 | -17.359423749 |
| 6  | 0 | 1 | 0.000000  | -14.628334273 | 21.224318206 | -18.072423749 |
| 7  | 0 | 2 | -0.200000 | -17.110334385 | 21.185318207 | -15.147423856 |
| 8  | 0 | 1 | 0.000000  | -17.412334312 | 19.887318231 | -14.458423726 |
| 9  | 0 | 1 | -0.100000 | -16.488334347 | 19.376318194 | -13.549423806 |
| 10 | 0 | 1 | 0.000000  | -16.723334361 | 18.200318314 | -12.843423955 |
| 11 | 0 | 1 | -0.100000 | -17.950334299 | 17.561318137 | -13.005423658 |
| 12 | 0 | 1 | 0.000000  | -18.898334254 | 18.020318247 | -13.915423744 |
| 13 | 0 | 1 | 0.030000  | -18.614334334 | 19.181318261 | -14.663423650 |
| 14 | 0 | 2 | -0.200000 | -20.186334122 | 17.262318112 | -14.060423724 |
| 15 | 0 | 1 | 0.000000  | -19.997334469 | 15.925318219 | -14.714423768 |
| 16 | 0 | 1 | -0.100000 | -19.242334355 | 14.960318066 | -14.052423827 |
| 17 | 0 | 1 | 0.000000  | -18.999334324 | 13.707318284 | -14.610423677 |
| 18 | 0 | 1 | -0.100000 | -19.611334313 | 13.385318257 | -15.817423694 |
| 19 | 0 | 1 | 0.000000  | -20.408334244 | 14.303318001 | -16.501423769 |
| 20 | 0 | 1 | 0.030000  | -20.565334309 | 15.595318295 | -15.961423747 |
| 21 | 0 | 2 | -0.200000 | -21.110334385 | 13.872318245 | -17.758423738 |
| 22 | 0 | 1 | 0.000000  | -20.195334423 | 13.286318280 | -18.789423697 |
| 23 | 0 | 1 | -0.100000 | -19.695334423 | 12.002318360 | -18.578423731 |
| 24 | 0 | 1 | 0.000000  | -18.802334297 | 11.410318352 | -19.465423696 |
| 25 | 0 | 1 | -0.100000 | -18.488334406 | 12.082318284 | -20.644423835 |
| 26 | 0 | 1 | 0.000000  | -18.998334397 | 13.347318150 | -20.921423785 |
| 27 | 0 | 1 | 0.030000  | -19.828334320 | 13.969318368 | -19.965423696 |
| 28 | 0 | 2 | -0.200000 | -18.672334421 | 13.989318348 | -22.237423532 |
| 29 | 0 | 1 | 0.000000  | -17.244334329 | 14.432318188 | -22.349423520 |
| 30 | 0 | 1 | -0.100000 | -16.239334334 | 13.469318368 | -22.352423780 |
| 31 | 0 | 1 | 0.000000  | -14.894334305 | 13.809318043 | -22.487423532 |
| 32 | 0 | 1 | -0.100000 | -14.561334360 | 15.145318009 | -22.692423932 |
| 33 | 0 | 1 | 0.000000  | -15.534334321 | 16.143318154 | -22.706423871 |
| 34 | 0 | 1 | 0.030000  | -16.880334366 | 15.785318352 | -22.498423688 |
| 35 | 0 | 2 | -0.200000 | -15.120334316 | 17.557318188 | -22.987423532 |
| 36 | 0 | 1 | 0.000000  | -14.396334279 | 18.207318284 | -21.846423738 |
| 37 | 0 | 1 | 0.030000  | -14.897334326 | 19.345318176 | -21.185423724 |
| 38 | 0 | 1 | 0.000000  | -14.128334273 | 19.998318173 | -20.201423757 |
| 39 | 0 | 1 | -0.100000 | -12.898334254 | 19.449318148 | -19.846423738 |
| 40 | 0 | 1 | 0.000000  | -12.417334307 | 18.282318093 | -20.438423745 |
| 41 | 0 | 1 | -0.100000 | -13.159334410 | 17.696318127 | -21.459423654 |
| 42 | 0 | 3 | -0.380000 | -16.135334332 | 19.783318259 | -21.574423902 |
| 43 | 0 | 4 | 0.000000  | -11.084334362 | 17.709318139 | -19.997423761 |

|    |   |   |           |               |              |               |
|----|---|---|-----------|---------------|--------------|---------------|
| 44 | 0 | 5 | -0.300000 | -10.918334473 | 17.848318316 | -18.481423728 |
| 45 | 0 | 2 | -0.200000 | -14.566334356 | 21.287318207 | -19.568423860 |
| 46 | 0 | 4 | 0.000000  | -13.838334311 | 12.722318627 | -22.457423799 |
| 47 | 0 | 5 | -0.300000 | -12.458334435 | 13.290317990 | -22.122423761 |
| 48 | 0 | 3 | -0.380000 | -17.893334378 | 16.704318024 | -22.451423757 |
| 49 | 0 | 4 | 0.000000  | -18.178334225 | 10.060317971 | -19.176423781 |
| 50 | 0 | 5 | -0.300000 | -18.319334257 | 9.684318520  | -17.700423740 |
| 51 | 0 | 3 | -0.380000 | -20.329334248 | 15.231317975 | -20.127423637 |
| 52 | 0 | 4 | 0.000000  | -18.030334223 | 12.765317894 | -13.924423806 |
| 53 | 0 | 5 | -0.300000 | -18.178334225 | 11.327318169 | -14.421423785 |
| 54 | 0 | 3 | -0.380000 | -21.284334172 | 16.582318284 | -16.581423752 |
| 55 | 0 | 4 | 0.000000  | -15.649334330 | 17.568318106 | -11.981423967 |
| 56 | 0 | 5 | -0.300000 | -14.594334353 | 18.586318232 | -11.546423547 |
| 57 | 0 | 3 | -0.380000 | -19.476334322 | 19.689318158 | -15.596423738 |
| 58 | 0 | 4 | 0.000000  | -12.108334292 | 21.054318204 | -15.197423808 |
| 59 | 0 | 5 | -0.300000 | -10.937334526 | 20.701318212 | -16.116423719 |
| 60 | 0 | 3 | -0.380000 | -16.990334380 | 21.120318208 | -18.101423733 |
| 61 | 0 | 5 | -0.300000 | -9.976334561  | 18.491318203 | -20.706423633 |
| 62 | 0 | 5 | -0.300000 | -10.964334477 | 16.227318265 | -20.353423707 |
| 63 | 0 | 5 | -0.300000 | -13.793334234 | 12.070318200 | -23.841423623 |
| 64 | 0 | 5 | -0.300000 | -14.188334335 | 11.666317917 | -21.405423753 |
| 65 | 0 | 5 | -0.300000 | -18.888334263 | 9.007318474  | -20.030423753 |
| 66 | 0 | 5 | -0.300000 | -16.689334322 | 10.088317849 | -19.530423753 |
| 67 | 0 | 5 | -0.300000 | -18.256334294 | 12.783318497 | -12.410423867 |
| 68 | 0 | 5 | -0.300000 | -16.611334313 | 13.261318184 | -14.224423759 |
| 69 | 0 | 5 | -0.300000 | -16.266334344 | 16.939318158 | -10.731423967 |
| 70 | 0 | 5 | -0.300000 | -14.978334356 | 16.472318150 | -12.817423932 |
| 71 | 0 | 5 | -0.300000 | -11.831334103 | 22.403318264 | -14.531423681 |
| 72 | 0 | 5 | -0.300000 | -12.230334271 | 19.965318181 | -14.126423709 |
| 73 | 0 | 6 | 0.100000  | -16.126334328 | 10.732317902 | -18.841423743 |
| 74 | 0 | 6 | 0.100000  | -17.926334370 | 8.679318406  | -17.506423749 |
| 75 | 0 | 6 | 0.100000  | -16.421334315 | 13.288318135 | -15.304423682 |
| 76 | 0 | 6 | 0.100000  | -17.378334273 | 10.688318230 | -14.026423805 |
| 77 | 0 | 6 | 0.100000  | -15.856334331 | 12.606318451 | -13.769423835 |
| 78 | 0 | 6 | 0.100000  | -14.503334273 | 16.894318081 | -13.713423841 |
| 79 | 0 | 6 | 0.100000  | -18.140334357 | 11.265317894 | -15.528423779 |
| 80 | 0 | 6 | 0.100000  | -17.788334358 | 10.389318444 | -17.034423761 |
| 81 | 0 | 6 | 0.100000  | -16.250334341 | 9.084318139  | -19.482423656 |
| 82 | 0 | 6 | 0.100000  | -14.184334386 | 19.152318217 | -12.409423940 |
| 83 | 0 | 6 | 0.100000  | -16.443334330 | 14.280318238 | -13.830423705 |
| 84 | 0 | 6 | 0.100000  | -16.514334310 | 10.485318162 | -20.551423661 |
| 85 | 0 | 6 | 0.100000  | -15.706334326 | 15.711317994 | -13.154423826 |
| 86 | 0 | 6 | 0.100000  | -19.377334345 | 9.706317879  | -17.388423748 |
| 87 | 0 | 6 | 0.100000  | -14.200334299 | 15.952318169 | -12.242423646 |
| 88 | 0 | 6 | 0.100000  | -19.136334408 | 10.891318299 | -14.108423822 |
| 89 | 0 | 6 | 0.100000  | -13.752334345 | 18.092318274 | -11.044423692 |
| 90 | 0 | 6 | 0.100000  | -13.515334357 | 10.802318551 | -21.473423593 |
| 91 | 0 | 6 | 0.100000  | -18.468334425 | 8.006318070  | -19.863423698 |
| 92 | 0 | 6 | 0.100000  | -17.500334371 | 12.184318520 | -11.888423555 |
| 93 | 0 | 6 | 0.100000  | -14.109334338 | 12.070318200 | -20.387423866 |
| 94 | 0 | 6 | 0.100000  | -12.409334410 | 13.657318093 | -21.086423747 |
| 95 | 0 | 6 | 0.100000  | -15.012334336 | 19.323318221 | -10.848423593 |
| 96 | 0 | 6 | 0.100000  | -15.516334344 | 16.387318112 | -10.151423566 |
| 97 | 0 | 6 | 0.100000  | -12.317334402 | 18.968318202 | -14.579423778 |
| 98 | 0 | 6 | 0.100000  | -11.676334370 | 12.530318238 | -22.244423978 |

|     |   |   |          |               |              |               |
|-----|---|---|----------|---------------|--------------|---------------|
| 99  | 0 | 6 | 0.100000 | -19.243334282 | 12.383317925 | -12.145423524 |
| 100 | 0 | 6 | 0.100000 | -15.227334309 | 11.292318322 | -21.517423742 |
| 101 | 0 | 6 | 0.100000 | -19.959334362 | 8.962318398  | -19.795423858 |
| 102 | 0 | 6 | 0.100000 | -19.989334095 | 11.453318574 | -17.664423756 |
| 103 | 0 | 6 | 0.100000 | -19.445334423 | 12.378317811 | -16.246423714 |
| 104 | 0 | 6 | 0.100000 | -18.798334349 | 15.187318303 | -13.064423673 |
| 105 | 0 | 6 | 0.100000 | -18.152334440 | 16.652317978 | -12.406423681 |
| 106 | 0 | 6 | 0.100000 | -11.352334488 | 19.957318164 | -13.468423717 |
| 107 | 0 | 6 | 0.100000 | -18.792334307 | 9.234317757  | -21.100423686 |
| 108 | 0 | 6 | 0.100000 | -17.788334358 | 11.602317788 | -21.354423635 |
| 109 | 0 | 6 | 0.100000 | -9.944334496  | 15.859318234 | -20.178423755 |
| 110 | 0 | 6 | 0.100000 | -18.201334227 | 13.814318158 | -12.018423669 |
| 111 | 0 | 6 | 0.100000 | -11.050334442 | 19.698318221 | -16.568423741 |
| 112 | 0 | 6 | 0.100000 | -9.985334385  | 20.718318202 | -15.572423808 |
| 113 | 0 | 6 | 0.100000 | -12.207334269 | 14.145318009 | -22.773423784 |
| 114 | 0 | 6 | 0.100000 | -11.648334492 | 15.609318234 | -19.753423803 |
| 115 | 0 | 6 | 0.100000 | -13.127334345 | 20.107318260 | -13.490423791 |
| 116 | 0 | 6 | 0.100000 | -17.070334304 | 16.233318306 | -11.002423875 |
| 117 | 0 | 6 | 0.100000 | -9.914334286  | 17.538318135 | -18.163423769 |
| 118 | 0 | 6 | 0.100000 | -11.646334160 | 17.229318120 | -17.941423766 |
| 119 | 0 | 6 | 0.100000 | -16.705334354 | 17.700318314 | -10.073423974 |
| 120 | 0 | 6 | 0.100000 | -16.502334345 | 12.403318383 | -22.218423955 |
| 121 | 0 | 6 | 0.100000 | -15.528334338 | 19.902318217 | -13.391423814 |
| 122 | 0 | 6 | 0.100000 | -14.768334378 | 11.642317750 | -24.109423749 |
| 123 | 0 | 6 | 0.100000 | -13.052334297 | 11.260317780 | -23.878423803 |
| 124 | 0 | 6 | 0.100000 | -11.214334477 | 16.042318322 | -21.412423723 |
| 125 | 0 | 6 | 0.100000 | -10.866334427 | 21.412318207 | -16.955423735 |
| 126 | 0 | 6 | 0.100000 | -14.592334378 | 21.126318209 | -14.177423827 |
| 127 | 0 | 6 | 0.100000 | -21.867334355 | 13.109317757 | -17.477423750 |
| 128 | 0 | 6 | 0.100000 | -20.622334469 | 17.104318120 | -13.052423589 |
| 129 | 0 | 6 | 0.100000 | -13.498334397 | 15.426318146 | -22.827423684 |
| 130 | 0 | 6 | 0.100000 | -11.069334496 | 18.893318154 | -18.141423754 |
| 131 | 0 | 6 | 0.100000 | -10.904334534 | 22.376318194 | -13.944423787 |
| 132 | 0 | 6 | 0.100000 | -18.873334397 | 13.255318142 | -23.045423620 |
| 133 | 0 | 6 | 0.100000 | -13.526334275 | 12.801318146 | -24.615423791 |
| 134 | 0 | 6 | 0.100000 | -12.765334357 | 16.794318177 | -21.968423955 |
| 135 | 0 | 6 | 0.100000 | -12.474334229 | 21.278318204 | -17.913423769 |
| 136 | 0 | 6 | 0.100000 | -21.698334206 | 14.708318211 | -18.196423762 |
| 137 | 0 | 6 | 0.100000 | -12.285334337 | 19.935318209 | -19.062423699 |
| 138 | 0 | 6 | 0.100000 | -20.937334526 | 17.874318100 | -14.606423728 |
| 139 | 0 | 6 | 0.100000 | -8.981334198  | 18.134318091 | -20.410423867 |
| 140 | 0 | 6 | 0.100000 | -17.025334347 | 21.975318231 | -14.372423761 |
| 141 | 0 | 6 | 0.100000 | -12.646334398 | 22.686318256 | -13.852423780 |
| 142 | 0 | 6 | 0.100000 | -19.369334448 | 14.833318211 | -22.437423818 |
| 143 | 0 | 7 | 0.350000 | -21.531334389 | 16.266318299 | -17.447423749 |
| 144 | 0 | 6 | 0.100000 | -11.730334271 | 23.201318242 | -15.278423660 |
| 145 | 0 | 7 | 0.350000 | -20.009334553 | 15.568318345 | -20.962423675 |
| 146 | 0 | 7 | 0.350000 | -20.224334229 | 19.099318244 | -15.656423800 |
| 147 | 0 | 6 | 0.100000 | -10.030334461 | 19.561318256 | -20.467423789 |
| 148 | 0 | 6 | 0.100000 | -17.960334290 | 21.503318198 | -15.791423790 |
| 149 | 0 | 6 | 0.100000 | -10.055334557 | 18.390318133 | -21.796423547 |
| 150 | 0 | 6 | 0.100000 | -14.450334299 | 17.561318137 | -23.872423761 |
| 151 | 0 | 7 | 0.350000 | -17.507334340 | 17.570318200 | -22.565423600 |
| 152 | 0 | 7 | 0.350000 | -17.728334296 | 21.100318208 | -17.496423744 |
| 153 | 0 | 6 | 0.100000 | -13.841334332 | 22.076318182 | -19.862423770 |

|     |   |   |          |               |              |               |
|-----|---|---|----------|---------------|--------------|---------------|
| 154 | 0 | 6 | 0.100000 | -16.004334334 | 18.159318186 | -23.295423620 |
| 155 | 0 | 7 | 0.350000 | -16.390334357 | 20.496318199 | -20.994423740 |
| 156 | 0 | 6 | 0.100000 | -15.541334320 | 21.628318198 | -19.981423728 |

**Bonds # (id, type, atom1, atom2)**

|    |   |    |     |     |   |    |     |
|----|---|----|-----|-----|---|----|-----|
| 1  | 1 | 1  | 60  | 82  | 4 | 41 | 134 |
| 2  | 2 | 1  | 6   | 83  | 7 | 42 | 155 |
| 3  | 2 | 1  | 2   | 84  | 8 | 43 | 61  |
| 4  | 3 | 2  | 7   | 85  | 8 | 43 | 62  |
| 5  | 2 | 2  | 3   | 86  | 8 | 43 | 44  |
| 6  | 4 | 3  | 126 | 87  | 9 | 44 | 130 |
| 7  | 2 | 3  | 4   | 88  | 9 | 44 | 118 |
| 8  | 2 | 4  | 5   | 89  | 9 | 44 | 117 |
| 9  | 5 | 4  | 58  | 90  | 6 | 45 | 156 |
| 10 | 4 | 5  | 135 | 91  | 6 | 45 | 153 |
| 11 | 2 | 5  | 6   | 92  | 8 | 46 | 47  |
| 12 | 3 | 6  | 45  | 93  | 8 | 46 | 64  |
| 13 | 6 | 7  | 140 | 94  | 8 | 46 | 63  |
| 14 | 3 | 8  | 7   | 95  | 9 | 47 | 94  |
| 15 | 6 | 7  | 148 | 96  | 9 | 47 | 98  |
| 16 | 2 | 8  | 13  | 97  | 9 | 47 | 113 |
| 17 | 2 | 8  | 9   | 98  | 7 | 48 | 151 |
| 18 | 2 | 9  | 10  | 99  | 8 | 49 | 65  |
| 19 | 4 | 9  | 121 | 100 | 8 | 49 | 66  |
| 20 | 2 | 10 | 11  | 101 | 8 | 49 | 50  |
| 21 | 5 | 10 | 55  | 102 | 9 | 50 | 86  |
| 22 | 4 | 11 | 105 | 103 | 9 | 50 | 74  |
| 23 | 2 | 11 | 12  | 104 | 9 | 50 | 80  |
| 24 | 2 | 12 | 13  | 105 | 7 | 51 | 145 |
| 25 | 3 | 12 | 14  | 106 | 8 | 52 | 68  |
| 26 | 1 | 13 | 57  | 107 | 8 | 52 | 53  |
| 27 | 3 | 15 | 14  | 108 | 8 | 52 | 67  |
| 28 | 6 | 14 | 138 | 109 | 9 | 53 | 79  |
| 29 | 6 | 14 | 128 | 110 | 9 | 53 | 88  |
| 30 | 2 | 15 | 16  | 111 | 9 | 53 | 76  |
| 31 | 2 | 15 | 20  | 112 | 7 | 54 | 143 |
| 32 | 2 | 16 | 17  | 113 | 8 | 55 | 69  |
| 33 | 4 | 16 | 104 | 114 | 8 | 55 | 56  |
| 34 | 5 | 17 | 52  | 115 | 8 | 55 | 70  |
| 35 | 2 | 17 | 18  | 116 | 9 | 56 | 95  |
| 36 | 4 | 18 | 103 | 117 | 9 | 56 | 89  |
| 37 | 2 | 18 | 19  | 118 | 9 | 56 | 82  |
| 38 | 2 | 19 | 20  | 119 | 7 | 57 | 146 |
| 39 | 3 | 19 | 21  | 120 | 8 | 58 | 72  |
| 40 | 1 | 20 | 54  | 121 | 8 | 58 | 71  |
| 41 | 3 | 22 | 21  | 122 | 8 | 58 | 59  |
| 42 | 6 | 21 | 127 | 123 | 9 | 59 | 111 |
| 43 | 6 | 21 | 136 | 124 | 9 | 59 | 125 |
| 44 | 2 | 22 | 23  | 125 | 9 | 59 | 112 |
| 45 | 2 | 22 | 27  | 126 | 7 | 60 | 152 |
| 46 | 4 | 23 | 102 | 127 | 9 | 61 | 139 |
| 47 | 2 | 23 | 24  | 128 | 9 | 61 | 147 |
| 48 | 2 | 24 | 25  | 129 | 9 | 61 | 149 |

|    |   |    |     |     |   |    |     |
|----|---|----|-----|-----|---|----|-----|
| 49 | 5 | 24 | 49  | 130 | 9 | 62 | 109 |
| 50 | 2 | 25 | 26  | 131 | 9 | 62 | 114 |
| 51 | 4 | 25 | 108 | 132 | 9 | 62 | 124 |
| 52 | 3 | 26 | 28  | 133 | 9 | 63 | 123 |
| 53 | 2 | 26 | 27  | 134 | 9 | 63 | 122 |
| 54 | 1 | 27 | 51  | 135 | 9 | 63 | 133 |
| 55 | 6 | 28 | 142 | 136 | 9 | 64 | 100 |
| 56 | 3 | 29 | 28  | 137 | 9 | 64 | 90  |
| 57 | 6 | 28 | 132 | 138 | 9 | 64 | 93  |
| 58 | 2 | 29 | 34  | 139 | 9 | 65 | 101 |
| 59 | 2 | 29 | 30  | 140 | 9 | 65 | 91  |
| 60 | 4 | 30 | 120 | 141 | 9 | 65 | 107 |
| 61 | 2 | 30 | 31  | 142 | 9 | 66 | 81  |
| 62 | 5 | 31 | 46  | 143 | 9 | 66 | 84  |
| 63 | 2 | 31 | 32  | 144 | 9 | 66 | 73  |
| 64 | 4 | 32 | 129 | 145 | 9 | 67 | 99  |
| 65 | 2 | 32 | 33  | 146 | 9 | 67 | 110 |
| 66 | 3 | 33 | 35  | 147 | 9 | 67 | 92  |
| 67 | 2 | 33 | 34  | 148 | 9 | 68 | 75  |
| 68 | 1 | 34 | 48  | 149 | 9 | 68 | 83  |
| 69 | 6 | 35 | 150 | 150 | 9 | 68 | 77  |
| 70 | 6 | 35 | 154 | 151 | 9 | 69 | 116 |
| 71 | 3 | 36 | 35  | 152 | 9 | 69 | 119 |
| 72 | 2 | 36 | 37  | 153 | 9 | 69 | 96  |
| 73 | 2 | 36 | 41  | 154 | 9 | 70 | 78  |
| 74 | 1 | 37 | 42  | 155 | 9 | 70 | 87  |
| 75 | 2 | 37 | 38  | 156 | 9 | 70 | 85  |
| 76 | 2 | 38 | 39  | 157 | 9 | 71 | 131 |
| 77 | 3 | 38 | 45  | 158 | 9 | 71 | 141 |
| 78 | 2 | 39 | 40  | 159 | 9 | 71 | 144 |
| 79 | 4 | 39 | 137 | 160 | 9 | 72 | 97  |
| 80 | 5 | 40 | 43  | 161 | 9 | 72 | 106 |
| 81 | 2 | 40 | 41  | 162 | 9 | 72 | 115 |

**Angles # (id, type, atom1, atom2, atom3)**

|    |   |   |   |     |     |    |     |    |     |
|----|---|---|---|-----|-----|----|-----|----|-----|
| 1  | 1 | 6 | 1 | 60  | 148 | 12 | 43  | 44 | 117 |
| 2  | 1 | 2 | 1 | 60  | 149 | 13 | 130 | 44 | 118 |
| 3  | 2 | 6 | 1 | 2   | 150 | 13 | 130 | 44 | 117 |
| 4  | 3 | 1 | 2 | 7   | 151 | 13 | 118 | 44 | 117 |
| 5  | 2 | 1 | 2 | 3   | 152 | 7  | 6   | 45 | 38  |
| 6  | 3 | 3 | 2 | 7   | 153 | 6  | 6   | 45 | 156 |
| 7  | 4 | 2 | 3 | 126 | 154 | 6  | 6   | 45 | 153 |
| 8  | 2 | 2 | 3 | 4   | 155 | 6  | 38  | 45 | 156 |
| 9  | 4 | 4 | 3 | 126 | 156 | 6  | 38  | 45 | 153 |
| 10 | 2 | 3 | 4 | 5   | 157 | 8  | 156 | 45 | 153 |
| 11 | 5 | 3 | 4 | 58  | 158 | 10 | 31  | 46 | 47  |
| 12 | 5 | 5 | 4 | 58  | 159 | 10 | 31  | 46 | 64  |
| 13 | 4 | 4 | 5 | 135 | 160 | 10 | 31  | 46 | 63  |
| 14 | 2 | 4 | 5 | 6   | 161 | 11 | 47  | 46 | 64  |
| 15 | 4 | 6 | 5 | 135 | 162 | 11 | 47  | 46 | 63  |
| 16 | 2 | 1 | 6 | 5   | 163 | 11 | 64  | 46 | 63  |
| 17 | 3 | 1 | 6 | 45  | 164 | 12 | 46  | 47 | 94  |
| 18 | 3 | 5 | 6 | 45  | 165 | 12 | 46  | 47 | 98  |
| 19 | 6 | 2 | 7 | 140 | 166 | 12 | 46  | 47 | 113 |



20 7 2 7 8  
21 6 2 7 148  
22 6 8 7 140  
23 8 140 7 148  
24 6 8 7 148  
25 3 13 8 7  
26 3 9 8 7  
27 2 13 8 9  
28 2 8 9 10  
29 4 8 9 121  
30 4 10 9 121  
31 2 9 10 11  
32 5 9 10 55  
33 5 11 10 55  
34 4 10 11 105  
35 2 10 11 12  
36 4 12 11 105  
37 2 11 12 13  
38 3 11 12 14  
39 3 13 12 14  
40 2 8 13 12  
41 1 8 13 57  
42 1 12 13 57  
43 7 12 14 15  
44 6 12 14 138  
45 6 12 14 128  
46 6 15 14 138  
47 6 15 14 128  
48 8 138 14 128  
49 3 16 15 14  
50 3 20 15 14  
51 2 16 15 20  
52 2 15 16 17  
53 4 15 16 104  
54 4 17 16 104  
55 5 16 17 52  
56 2 16 17 18  
57 5 18 17 52  
58 4 17 18 103  
59 2 17 18 19  
60 4 19 18 103  
61 2 18 19 20  
62 3 18 19 21  
63 3 20 19 21  
64 2 15 20 19  
65 1 15 20 54  
66 1 19 20 54  
67 7 19 21 22  
68 6 19 21 127  
69 6 19 21 136  
70 6 22 21 127  
71 6 22 21 136  
72 8 127 21 136  
73 3 23 22 21  
74 3 27 22 21

167 13 94 47 98  
168 13 94 47 113  
169 13 98 47 113  
170 9 34 48 151  
171 10 24 49 65  
172 10 24 49 66  
173 10 24 49 50  
174 11 65 49 66  
175 11 65 49 50  
176 11 66 49 50  
177 12 49 50 86  
178 12 49 50 74  
179 12 49 50 80  
180 13 86 50 74  
181 13 86 50 80  
182 13 74 50 80  
183 9 27 51 145  
184 10 17 52 68  
185 10 17 52 53  
186 10 17 52 67  
187 11 68 52 53  
188 11 68 52 67  
189 11 53 52 67  
190 12 52 53 79  
191 12 52 53 88  
192 12 52 53 76  
193 13 79 53 88  
194 13 79 53 76  
195 13 88 53 76  
196 9 20 54 143  
197 10 10 55 69  
198 10 10 55 56  
199 10 10 55 70  
200 11 69 55 56  
201 11 69 55 70  
202 11 56 55 70  
203 12 55 56 95  
204 12 55 56 89  
205 12 55 56 82  
206 13 95 56 89  
207 13 95 56 82  
208 13 89 56 82  
209 9 13 57 146  
210 10 4 58 72  
211 10 4 58 71  
212 10 4 58 59  
213 11 72 58 71  
214 11 72 58 59  
215 11 71 58 59  
216 12 58 59 111  
217 12 58 59 125  
218 12 58 59 112  
219 13 111 59 125  
220 13 111 59 112  
221 13 125 59 112

75 2 23 22 27  
76 4 22 23 102  
77 2 22 23 24  
78 4 24 23 102  
79 2 23 24 25  
80 5 23 24 49  
81 5 25 24 49  
82 2 24 25 26  
83 4 24 25 108  
84 4 26 25 108  
85 3 25 26 28  
86 2 25 26 27  
87 3 27 26 28  
88 2 22 27 26  
89 1 22 27 51  
90 1 26 27 51  
91 6 26 28 142  
92 7 26 28 29  
93 6 26 28 132  
94 6 29 28 142  
95 8 142 28 132  
96 6 29 28 132  
97 3 34 29 28  
98 3 30 29 28  
99 2 34 29 30  
100 4 29 30 120  
101 2 29 30 31  
102 4 31 30 120  
103 5 30 31 46  
104 2 30 31 32  
105 5 32 31 46  
106 4 31 32 129  
107 2 31 32 33  
108 4 33 32 129  
109 3 32 33 35  
110 2 32 33 34  
111 3 34 33 35  
112 2 29 34 33  
113 1 29 34 48  
114 1 33 34 48  
115 6 33 35 150  
116 6 33 35 154  
117 7 33 35 36  
118 8 150 35 154  
119 6 36 35 150  
120 6 36 35 154  
121 3 37 36 35  
122 3 41 36 35  
123 2 37 36 41  
124 1 36 37 42  
125 2 36 37 38  
126 1 38 37 42  
127 2 37 38 39  
128 3 37 38 45  
129 3 39 38 45

222 9 1 60 152  
223 12 43 61 139  
224 12 43 61 147  
225 12 43 61 149  
226 13 139 61 147  
227 13 139 61 149  
228 13 147 61 149  
229 12 43 62 109  
230 12 43 62 114  
231 12 43 62 124  
232 13 109 62 114  
233 13 109 62 124  
234 13 114 62 124  
235 12 46 63 123  
236 12 46 63 122  
237 12 46 63 133  
238 13 123 63 122  
239 13 123 63 133  
240 13 122 63 133  
241 12 46 64 100  
242 12 46 64 90  
243 12 46 64 93  
244 13 100 64 90  
245 13 100 64 93  
246 13 90 64 93  
247 12 49 65 101  
248 12 49 65 91  
249 12 49 65 107  
250 13 101 65 91  
251 13 101 65 107  
252 13 91 65 107  
253 12 49 66 81  
254 12 49 66 84  
255 12 49 66 73  
256 13 81 66 84  
257 13 81 66 73  
258 13 84 66 73  
259 12 52 67 99  
260 12 52 67 110  
261 12 52 67 92  
262 13 99 67 110  
263 13 99 67 92  
264 13 110 67 92  
265 12 52 68 75  
266 12 52 68 83  
267 12 52 68 77  
268 13 75 68 83  
269 13 75 68 77  
270 13 83 68 77  
271 12 55 69 116  
272 12 55 69 119  
273 12 55 69 96  
274 13 116 69 119  
275 13 116 69 96  
276 13 119 69 96

|     |    |    |    |     |
|-----|----|----|----|-----|
| 130 | 2  | 38 | 39 | 40  |
| 131 | 4  | 38 | 39 | 137 |
| 132 | 4  | 40 | 39 | 137 |
| 133 | 5  | 39 | 40 | 43  |
| 134 | 2  | 39 | 40 | 41  |
| 135 | 5  | 41 | 40 | 43  |
| 136 | 2  | 36 | 41 | 40  |
| 137 | 4  | 36 | 41 | 134 |
| 138 | 4  | 40 | 41 | 134 |
| 139 | 9  | 37 | 42 | 155 |
| 140 | 10 | 40 | 43 | 61  |
| 141 | 10 | 40 | 43 | 62  |
| 142 | 10 | 40 | 43 | 44  |
| 143 | 11 | 61 | 43 | 62  |
| 144 | 11 | 61 | 43 | 44  |
| 145 | 11 | 62 | 43 | 44  |
| 146 | 12 | 43 | 44 | 130 |
| 147 | 12 | 43 | 44 | 118 |

|     |    |     |    |     |
|-----|----|-----|----|-----|
| 277 | 12 | 55  | 70 | 78  |
| 278 | 12 | 55  | 70 | 87  |
| 279 | 12 | 55  | 70 | 85  |
| 280 | 13 | 78  | 70 | 87  |
| 281 | 13 | 78  | 70 | 85  |
| 282 | 13 | 87  | 70 | 85  |
| 283 | 12 | 58  | 71 | 131 |
| 284 | 12 | 58  | 71 | 141 |
| 285 | 12 | 58  | 71 | 144 |
| 286 | 13 | 131 | 71 | 141 |
| 287 | 13 | 131 | 71 | 144 |
| 288 | 13 | 141 | 71 | 144 |
| 289 | 12 | 58  | 72 | 97  |
| 290 | 12 | 58  | 72 | 106 |
| 291 | 12 | 58  | 72 | 115 |
| 292 | 13 | 97  | 72 | 106 |
| 293 | 13 | 97  | 72 | 115 |
| 294 | 13 | 106 | 72 | 115 |

**Table S3.** Topology and Potential parameters for *DPPG* phospholipid molecule by LAMMPS style and according to the *DPPG* model.

**LAMMPS DPPG # units – real**

109 atoms  
 107 bonds  
 186 angles  
 246 dihedrals

11 atom types  
 17 bond types  
 36 angle types  
 52 dihedral types

0.000000000 40.000000000 xlo xhi  
 0.000000000 15.000000000 ylo yhi  
 0.000000000 15.000000000 zlo zhi

**Masses**

1 30.973801  
 2 12.011150  
 3 15.999400  
 4 15.999400  
 5 12.011150  
 6 12.011150  
 7 1.007970  
 8 15.999400  
 9 1.007970  
 10 12.011150  
 11 22.990000

**Pair Coeffs**

1 0.1999976833 3.7417782334  
 2 0.0389999952 3.8754094636  
 3 0.2280000124 2.8597848722  
 4 0.2280000124 2.8597848722  
 5 0.0389999952 3.8754094636  
 6 0.1599999990 3.4745050026  
 7 0.0380000011 2.4499714540  
 8 0.2280000124 2.8597848722  
 9 0.0380000011 2.4499714540  
 10 0.0389999952 3.8754094636  
 11 1.6071428571 1.8974388864

**Bond Coeffs**

1 480.0000 1.5300  
 2 245.2000 1.6100  
 3 322.7158 1.5260  
 4 322.7158 1.5260  
 5 340.6175 1.1050  
 6 273.2000 1.4250  
 7 384.0000 1.4200  
 8 340.6175 1.1050  
 9 273.2000 1.4250  
 10 273.2000 1.4250  
 11 322.7158 1.5260  
 12 340.6175 1.1050  
 13 322.7158 1.5260  
 14 540.6336 0.9600  
 15 322.7158 1.5260  
 16 340.6175 1.1050  
 17 384.0000 1.4200

**Angle Coeffs**

1 110.0000 109.5000  
 2 110.0000 109.5000  
 3 110.0000 109.5000  
 4 46.6000 110.5000  
 5 44.4000 110.0000  
 6 44.4000 110.0000  
 7 39.5000 106.4000  
 8 72.0000 120.0000  
 9 57.0000 109.5000  
 10 70.0000 109.5000  
 11 46.6000 110.5000  
 12 70.0000 109.5000  
 13 44.4000 110.0000  
 14 57.0000 109.5000  
 15 70.0000 109.5000  
 16 57.0000 109.5000  
 17 60.0000 109.5000  
 18 70.0000 109.5000

|    |         |          |  |  |  |  |
|----|---------|----------|--|--|--|--|
| 19 | 70.0000 | 109.5000 |  |  |  |  |
| 20 | 44.4000 | 110.0000 |  |  |  |  |
| 21 | 46.6000 | 110.5000 |  |  |  |  |
| 22 | 46.6000 | 110.5000 |  |  |  |  |
| 23 | 44.4000 | 110.0000 |  |  |  |  |
| 24 | 46.6000 | 110.5000 |  |  |  |  |
| 25 | 44.4000 | 110.0000 |  |  |  |  |
| 26 | 46.6000 | 110.5000 |  |  |  |  |
| 27 | 60.0000 | 109.5000 |  |  |  |  |
| 28 | 70.0000 | 109.5000 |  |  |  |  |
| 29 | 58.5000 | 106.0000 |  |  |  |  |
| 30 | 46.6000 | 110.5000 |  |  |  |  |
| 31 | 44.4000 | 110.0000 |  |  |  |  |
| 32 | 44.4000 | 110.0000 |  |  |  |  |
| 33 | 39.5000 | 106.4000 |  |  |  |  |
| 34 | 70.0000 | 109.5000 |  |  |  |  |
| 35 | 57.0000 | 109.5000 |  |  |  |  |
| 36 | 58.5000 | 106.0000 |  |  |  |  |

### Dihedral Coeffs

|    |        |   |   |          |        |     |
|----|--------|---|---|----------|--------|-----|
| 1  | 0.2500 | 1 | 3 |          |        |     |
| 2  | 0.2500 | 1 | 3 |          |        |     |
| 3  | 0.1581 | 1 | 3 |          |        |     |
| 4  | 0.1581 | 1 | 3 |          |        |     |
| 5  | 0.1581 | 1 | 3 |          |        |     |
| 6  | 0.1581 | 1 | 3 |          |        |     |
| 7  | 0.1581 | 1 | 3 |          |        |     |
| 8  | 0.1581 | 1 | 3 |          |        |     |
| 9  | 0.1581 | 1 | 3 |          |        |     |
| 10 | 0.1581 | 1 | 3 |          |        |     |
| 11 | 0.1581 | 1 | 3 |          |        |     |
| 12 | 0.1581 | 1 | 3 |          |        |     |
| 13 | 0.1300 | 1 | 3 |          |        |     |
|    |        |   |   | 14       | 0.1300 | 1 3 |
|    |        |   |   | 15       | 0.1581 | 1 3 |
|    |        |   |   | 16       | 0.1581 | 1 3 |
|    |        |   |   | 17       | 0.1581 | 1 3 |
|    |        |   |   | 18       | 0.1300 | 1 3 |
|    |        |   |   | 19       | 0.1300 | 1 3 |
|    |        |   |   | 20       | 0.1581 | 1 3 |
|    |        |   |   | 21       | 0.1581 | 1 3 |
|    |        |   |   | 22       | 0.1300 | 1 3 |
|    |        |   |   | 23       | 0.1300 | 1 3 |
|    |        |   |   | 24       | 0.1300 | 1 3 |
|    |        |   |   | 25       | 0.1300 | 1 3 |
|    |        |   |   | 26       | 0.1950 | 1 3 |
|    |        |   |   | 27       | 0.1950 | 1 3 |
|    |        |   |   | 28       | 0.2371 | 1 3 |
|    |        |   |   | 29       | 0.2371 | 1 3 |
|    |        |   |   | 30       | 0.1581 | 1 3 |
|    |        |   |   | 31       | 0.1581 | 1 3 |
|    |        |   |   | 32       | 0.1581 | 1 3 |
|    |        |   |   | 33       | 0.1581 | 1 3 |
|    |        |   |   | 34       | 0.2371 | 1 3 |
|    |        |   |   | 35       | 0.2371 | 1 3 |
|    |        |   |   | 36       | 0.2371 | 1 3 |
|    |        |   |   | 37       | 0.2371 | 1 3 |
|    |        |   |   | 38       | 0.3556 | 1 3 |
|    |        |   |   | 39       | 0.3556 | 1 3 |
|    |        |   |   | 40       | 0.3556 | 1 3 |
|    |        |   |   | 41       | 0.3556 | 1 3 |
|    |        |   |   | 42       | 0.3556 | 1 3 |
|    |        |   |   | 43       | 0.1950 | 1 3 |
|    |        |   |   | 44       | 0.1950 | 1 3 |
|    |        |   |   | 45       | 0.3556 | 1 3 |
|    |        |   |   | 46       | 0.3556 | 1 3 |
|    |        |   |   | 47 to 51 | 0.1581 | 1 3 |

### Atoms

|    |   |   |           |              |              |             |
|----|---|---|-----------|--------------|--------------|-------------|
| 1  | 0 | 1 | 1.400000  | 8.778427525  | 7.127042974  | 4.479965264 |
| 2  | 0 | 2 | -0.200000 | 7.585427685  | 11.306042875 | 5.300965244 |
| 3  | 0 | 3 | -0.500000 | 10.236427231 | 6.641043032  | 4.988965208 |
| 4  | 0 | 3 | -0.500000 | 8.567427082  | 8.479042972  | 5.363965208 |
| 5  | 0 | 4 | -0.850000 | 7.730427189  | 6.250043000  | 5.022965247 |
| 6  | 0 | 4 | -0.850000 | 8.852426930  | 7.327042962  | 3.068965251 |
| 7  | 0 | 2 | -0.050000 | 9.461427136  | 9.655042971  | 5.120965177 |
| 8  | 0 | 5 | -0.070000 | 8.641427441  | 10.802042927 | 4.340965325 |
| 9  | 0 | 2 | -0.050000 | 10.358427448 | 6.384042944  | 6.435965220 |
| 10 | 0 | 5 | 0.050000  | 11.892427368 | 6.610043014  | 6.708965206 |
| 11 | 0 | 2 | -0.050000 | 12.782427235 | 5.823043073  | 5.787965232 |
| 12 | 0 | 3 | -0.300000 | 12.203427239 | 8.071042987  | 6.454965220 |
| 13 | 0 | 3 | -0.150000 | 11.910427494 | 8.418042983  | 8.696965272 |
| 14 | 0 | 6 | 0.300000  | 12.184427185 | 8.731043006  | 7.586965257 |
| 15 | 0 | 2 | -0.200000 | 12.541427536 | 10.251043047 | 7.211965198 |
| 16 | 0 | 2 | -0.200000 | 13.895427389 | 10.694042887 | 7.950965220 |
| 17 | 0 | 2 | -0.200000 | 15.058427258 | 9.905042971  | 7.458965236 |
| 18 | 0 | 2 | -0.200000 | 16.437427325 | 10.295042957 | 8.222965175 |
| 19 | 0 | 6 | -0.100000 | 17.646427347 | 9.602042998  | 7.658965165 |

|    |   |   |           |              |              |             |
|----|---|---|-----------|--------------|--------------|-------------|
| 20 | 0 | 6 | -0.100000 | 18.863427324 | 10.217042888 | 8.482965285 |
| 21 | 0 | 6 | -0.100000 | 20.184427424 | 9.614042963  | 7.767965252 |
| 22 | 0 | 6 | -0.100000 | 21.401427431 | 10.310043062 | 8.612965161 |
| 23 | 0 | 6 | -0.100000 | 22.697427197 | 9.662042941  | 7.815965230 |
| 24 | 0 | 6 | -0.100000 | 23.823427124 | 10.262042965 | 8.648965174 |
| 25 | 0 | 6 | -0.100000 | 25.231427117 | 9.707043017  | 7.954965169 |
| 26 | 0 | 3 | -0.300000 | 14.172427340 | 6.037042941  | 6.346965218 |
| 27 | 0 | 3 | -0.150000 | 14.975427313 | 4.924042906  | 4.619965250 |
| 28 | 0 | 6 | 0.300000  | 15.136427326 | 5.434042896  | 5.630965227 |
| 29 | 0 | 6 | -0.100000 | 16.461427374 | 6.018043007  | 6.358965220 |
| 30 | 0 | 6 | -0.100000 | 17.683427347 | 5.400042976  | 5.671965236 |
| 31 | 0 | 6 | -0.100000 | 18.981427355 | 5.785042967  | 6.513965221 |
| 32 | 0 | 6 | -0.100000 | 20.144427462 | 5.342042888  | 5.754965240 |
| 33 | 0 | 6 | -0.100000 | 21.445427342 | 5.824043001  | 6.453965220 |
| 34 | 0 | 6 | -0.100000 | 22.746427460 | 5.418043102  | 5.686965221 |
| 35 | 0 | 6 | -0.100000 | 23.987427159 | 5.879043068  | 6.508965218 |
| 36 | 0 | 6 | -0.100000 | 25.253427429 | 5.487042869  | 5.653965229 |
| 37 | 0 | 6 | -0.100000 | 26.465427799 | 5.894042934  | 6.494965220 |
| 38 | 0 | 6 | -0.100000 | 27.724427624 | 5.328042949  | 5.728965217 |
| 39 | 0 | 6 | -0.100000 | 28.894427700 | 6.235043014  | 6.381965222 |
| 40 | 0 | 7 | 0.100000  | 9.812427445  | 10.043043102 | 6.065965230 |
| 41 | 0 | 7 | 0.100000  | 10.307427330 | 9.347043003  | 4.521965200 |
| 42 | 0 | 8 | -0.380000 | 9.302427693  | 11.607042993 | 4.057965333 |
| 43 | 0 | 7 | 0.100000  | 8.176427288  | 10.391042913 | 3.457965190 |
| 44 | 0 | 7 | 0.100000  | 9.754427357  | 7.076042975  | 7.005965227 |
| 45 | 0 | 7 | 0.100000  | 10.064427300 | 5.372043098  | 6.676965216 |
| 46 | 0 | 7 | 0.100000  | 12.518427296 | 4.775042976  | 5.802965218 |
| 47 | 0 | 7 | 0.100000  | 12.714427395 | 6.196042980  | 4.775965268 |
| 48 | 0 | 7 | 0.100000  | 12.673427506 | 10.334042991 | 6.142965222 |
| 49 | 0 | 7 | 0.100000  | 11.733427448 | 10.896043028 | 7.525965268 |
| 50 | 0 | 7 | 0.100000  | 14.075427456 | 11.741043056 | 7.761965210 |
| 51 | 0 | 7 | 0.100000  | 13.787427349 | 10.534043039 | 9.013965184 |
| 52 | 0 | 7 | 0.100000  | 14.859427376 | 8.856043006  | 7.616965229 |
| 53 | 0 | 7 | 0.100000  | 15.181427403 | 10.096043075 | 6.401965221 |
| 54 | 0 | 7 | 0.100000  | 16.585427327 | 11.362042869 | 8.141965205 |
| 55 | 0 | 7 | 0.100000  | 16.338427348 | 10.023042883 | 9.263965184 |
| 56 | 0 | 7 | 0.100000  | 17.580427347 | 8.535042967  | 7.809965188 |
| 57 | 0 | 7 | 0.100000  | 18.854427381 | 11.295042957 | 8.425965244 |
| 58 | 0 | 7 | 0.100000  | 20.217427416 | 8.539042975  | 7.852965170 |
| 59 | 0 | 7 | 0.100000  | 21.377427263 | 11.387042965 | 8.536965186 |
| 60 | 0 | 7 | 0.100000  | 22.696427269 | 8.582042958  | 7.854965264 |
| 61 | 0 | 7 | 0.100000  | 23.786427422 | 11.341042961 | 8.614965254 |
| 62 | 0 | 7 | 0.100000  | 25.281427307 | 10.039042915 | 6.917965228 |
| 63 | 0 | 7 | 0.100000  | 16.489427371 | 7.093042995  | 6.262965226 |
| 64 | 0 | 7 | 0.100000  | 17.623427345 | 4.326043094  | 5.633965248 |
| 65 | 0 | 7 | 0.100000  | 19.023427291 | 6.854042972  | 6.659965226 |
| 66 | 0 | 7 | 0.100000  | 20.146427317 | 4.263042892  | 5.698965246 |
| 67 | 0 | 7 | 0.100000  | 21.414427443 | 6.900042976  | 6.531965220 |
| 68 | 0 | 7 | 0.100000  | 22.771427555 | 4.346043075  | 5.562965209 |
| 69 | 0 | 7 | 0.100000  | 23.957427426 | 6.947043027  | 6.663965220 |
| 70 | 0 | 7 | 0.100000  | 25.268427296 | 4.424042906  | 5.465965206 |
| 71 | 0 | 7 | 0.100000  | 26.525427265 | 6.970043029  | 6.573965223 |
| 72 | 0 | 7 | 0.100000  | 27.873427792 | 4.277043070  | 5.930965239 |
| 73 | 0 | 7 | 0.100000  | 28.924427433 | 6.071042980  | 7.458965236 |
| 74 | 0 | 7 | 0.100000  | 7.794663742  | 10.897547443 | 6.344493735 |

|     |   |    |           |              |              |             |
|-----|---|----|-----------|--------------|--------------|-------------|
| 75  | 0 | 7  | 0.100000  | 7.609065069  | 12.445494067 | 5.327275157 |
| 76  | 0 | 9  | 0.350000  | 9.018787195  | 12.529082978 | 4.607046708 |
| 77  | 0 | 7  | 0.100000  | 12.132765828 | 6.348493670  | 7.792214634 |
| 78  | 0 | 2  | -0.200000 | 26.439427777 | 10.261043037 | 8.729965264 |
| 79  | 0 | 7  | 0.100000  | 26.391427441 | 9.934043015  | 9.748965317 |
| 80  | 0 | 7  | 0.100000  | 26.423427029 | 11.330043043 | 8.695965106 |
| 81  | 0 | 2  | -0.200000 | 27.741427822 | 9.749042953  | 8.087965185 |
| 82  | 0 | 7  | 0.100000  | 27.759427471 | 8.679042960  | 8.120965177 |
| 83  | 0 | 7  | 0.100000  | 27.790427609 | 10.077043022 | 7.069965238 |
| 84  | 0 | 2  | -0.200000 | 30.250427647 | 5.845042909  | 5.766965205 |
| 85  | 0 | 7  | 0.100000  | 30.222427769 | 6.006042923  | 4.708965236 |
| 86  | 0 | 7  | 0.100000  | 30.446427746 | 4.813043083  | 5.965965206 |
| 87  | 0 | 2  | -0.200000 | 31.363427563 | 6.706042970  | 6.388965221 |
| 88  | 0 | 7  | 0.100000  | 31.168426914 | 7.740042980  | 6.190965230 |
| 89  | 0 | 7  | 0.100000  | 31.393427296 | 6.544043030  | 7.446965212 |
| 90  | 0 | 2  | -0.200000 | 32.718427105 | 6.311042990  | 5.773965234 |
| 91  | 0 | 7  | 0.100000  | 32.689427777 | 6.472043003  | 4.716965252 |
| 92  | 0 | 7  | 0.100000  | 32.912427349 | 5.277043070  | 5.970965231 |
| 93  | 0 | 10 | -0.300000 | 33.834428234 | 7.171043004  | 6.393965220 |
| 94  | 0 | 7  | 0.100000  | 33.862428112 | 7.010042990  | 7.452965194 |
| 95  | 0 | 7  | 0.100000  | 33.639427586 | 8.203042979  | 6.194965208 |
| 96  | 0 | 7  | 0.100000  | 34.776427670 | 6.897042955  | 5.965965206 |
| 97  | 0 | 2  | -0.200000 | 28.947427197 | 10.308042969 | 8.863965327 |
| 98  | 0 | 7  | 0.100000  | 28.929427548 | 11.377042974 | 8.830965334 |
| 99  | 0 | 7  | 0.100000  | 28.898427410 | 9.983043040  | 9.882965142 |
| 100 | 0 | 10 | -0.300000 | 30.250427647 | 9.798042978  | 8.222965175 |
| 101 | 0 | 7  | 0.100000  | 30.299427433 | 10.125042881 | 7.203965241 |
| 102 | 0 | 7  | 0.100000  | 30.268427296 | 8.729042972  | 8.256965214 |
| 103 | 0 | 7  | 0.100000  | 31.089427395 | 10.186042990 | 8.762965256 |
| 104 | 0 | 2  | -0.170000 | 6.252427502  | 10.851042951 | 4.851965243 |
| 105 | 0 | 7  | 0.100000  | 6.228512107  | 9.711561355  | 4.827273080 |
| 106 | 0 | 8  | -0.380000 | 5.504427357  | 11.209042991 | 5.529965216 |
| 107 | 0 | 9  | 0.350000  | 5.978294393  | 11.861391172 | 6.292849155 |
| 108 | 0 | 7  | 0.100000  | 6.043830271  | 11.257990814 | 3.807704457 |
| 109 | 0 | 11 | 1.000000  | 9.084000000  | 8.280000000  | 0.2000      |

**Bonds**

|    |   |   |     |    |    |    |    |
|----|---|---|-----|----|----|----|----|
|    |   |   |     | 19 | 9  | 12 | 10 |
|    |   |   |     | 20 | 4  | 11 | 10 |
| 1  | 1 | 1 | 5   | 21 | 8  | 10 | 77 |
| 2  | 2 | 1 | 3   | 22 | 6  | 11 | 26 |
| 3  | 2 | 1 | 4   | 23 | 5  | 11 | 47 |
| 4  | 1 | 1 | 6   | 24 | 5  | 11 | 46 |
| 5  | 3 | 2 | 104 | 25 | 10 | 12 | 14 |
| 6  | 4 | 2 | 8   | 26 | 10 | 13 | 14 |
| 7  | 5 | 2 | 74  | 27 | 11 | 15 | 14 |
| 8  | 5 | 2 | 75  | 28 | 5  | 15 | 49 |
| 9  | 6 | 9 | 3   | 29 | 3  | 15 | 16 |
| 10 | 6 | 7 | 4   | 30 | 5  | 15 | 48 |
| 11 | 5 | 7 | 40  | 31 | 5  | 16 | 50 |
| 12 | 5 | 7 | 41  | 32 | 3  | 16 | 17 |
| 13 | 4 | 7 | 8   | 33 | 5  | 16 | 51 |
| 14 | 7 | 8 | 42  | 34 | 5  | 17 | 52 |
| 15 | 8 | 8 | 43  | 35 | 3  | 17 | 18 |
| 16 | 4 | 9 | 10  | 36 | 5  | 17 | 53 |
| 17 | 5 | 9 | 44  | 37 | 11 | 18 | 19 |
| 18 | 5 | 9 | 45  | 38 | 5  | 18 | 54 |

39 5 18 55  
 40 12 19 56  
 41 13 19 20  
 42 13 20 21  
 43 12 20 57  
 44 12 21 58  
 45 13 21 22  
 46 13 22 23  
 47 12 22 59  
 48 12 23 60  
 49 13 23 24  
 50 13 24 25  
 51 12 24 61  
 52 12 25 62  
 53 11 78 25  
 54 10 26 28  
 55 10 27 28  
 56 13 28 29  
 57 12 29 63  
 58 13 29 30  
 59 12 30 64  
 60 13 30 31  
 61 12 31 65  
 62 13 31 32  
 63 12 32 66  
 64 13 32 33  
 65 12 33 67  
 66 13 33 34  
 67 12 34 68  
 68 13 34 35  
 69 12 35 69  
 70 13 35 36  
 71 12 36 70  
 72 13 36 37  
 73 12 37 71

74 13 37 38  
 75 12 38 72  
 76 13 38 39  
 77 11 84 39  
 78 12 39 73  
 79 14 42 76  
 80 3 78 81  
 81 5 78 80  
 82 5 78 79  
 83 5 81 82  
 84 5 81 83  
 85 3 81 97  
 86 5 84 85  
 87 3 84 87  
 88 5 84 86  
 89 5 87 88  
 90 3 87 90  
 91 5 87 89  
 92 5 90 91  
 93 15 90 93  
 94 5 90 92  
 95 16 96 93  
 96 16 95 93  
 97 16 94 93  
 98 15 97 100  
 99 5 97 98  
 100 5 97 99  
 101 16 101 100  
 102 16 102 100  
 103 16 103 100  
 104 17 104 106  
 105 5 104 105  
 106 5 104 108  
 107 14 106 107

**Angles**

1 1 3 1 5  
 2 1 4 1 5  
 3 2 5 1 6  
 4 3 3 1 4  
 5 1 3 1 6  
 6 1 4 1 6  
 7 4 104 2 8  
 8 5 104 2 74  
 9 5 104 2 75  
 10 6 8 2 74  
 11 6 8 2 75  
 12 7 74 2 75  
 13 8 1 3 9  
 14 8 1 4 7  
 15 9 4 7 40  
 16 9 4 7 41  
 17 10 4 7 8

18 7 40 7 41  
 19 6 8 7 40  
 20 6 8 7 41  
 21 11 2 8 7  
 22 12 2 8 42  
 23 13 2 8 43  
 24 12 7 8 42  
 25 13 7 8 43  
 26 14 43 8 42  
 27 10 3 9 10  
 28 9 3 9 44  
 29 9 3 9 45  
 30 6 10 9 44  
 31 6 10 9 45  
 32 7 44 9 45  
 33 15 9 10 12  
 34 11 9 10 11



|    |    |    |    |    |     |    |    |    |    |
|----|----|----|----|----|-----|----|----|----|----|
| 35 | 13 | 9  | 10 | 77 | 90  | 25 | 25 | 24 | 61 |
| 36 | 15 | 11 | 10 | 12 | 91  | 25 | 24 | 25 | 62 |
| 37 | 16 | 12 | 10 | 77 | 92  | 24 | 78 | 25 | 24 |
| 38 | 13 | 11 | 10 | 77 | 93  | 23 | 78 | 25 | 62 |
| 39 | 10 | 26 | 11 | 10 | 94  | 27 | 11 | 26 | 28 |
| 40 | 6  | 10 | 11 | 47 | 95  | 18 | 26 | 28 | 27 |
| 41 | 6  | 10 | 11 | 46 | 96  | 28 | 26 | 28 | 29 |
| 42 | 9  | 26 | 11 | 47 | 97  | 28 | 27 | 28 | 29 |
| 43 | 9  | 26 | 11 | 46 | 98  | 25 | 28 | 29 | 63 |
| 44 | 7  | 47 | 11 | 46 | 99  | 26 | 28 | 29 | 30 |
| 45 | 17 | 10 | 12 | 14 | 100 | 25 | 30 | 29 | 63 |
| 46 | 18 | 12 | 14 | 13 | 101 | 25 | 29 | 30 | 64 |
| 47 | 19 | 15 | 14 | 12 | 102 | 26 | 29 | 30 | 31 |
| 48 | 19 | 15 | 14 | 13 | 103 | 25 | 31 | 30 | 64 |
| 49 | 20 | 14 | 15 | 49 | 104 | 25 | 30 | 31 | 65 |
| 50 | 21 | 16 | 15 | 14 | 105 | 26 | 30 | 31 | 32 |
| 51 | 20 | 14 | 15 | 48 | 106 | 25 | 32 | 31 | 65 |
| 52 | 5  | 16 | 15 | 49 | 107 | 25 | 31 | 32 | 66 |
| 53 | 7  | 49 | 15 | 48 | 108 | 26 | 31 | 32 | 33 |
| 54 | 5  | 16 | 15 | 48 | 109 | 25 | 33 | 32 | 66 |
| 55 | 5  | 15 | 16 | 50 | 110 | 25 | 32 | 33 | 67 |
| 56 | 22 | 15 | 16 | 17 | 111 | 26 | 32 | 33 | 34 |
| 57 | 5  | 15 | 16 | 51 | 112 | 25 | 34 | 33 | 67 |
| 58 | 5  | 17 | 16 | 50 | 113 | 25 | 33 | 34 | 68 |
| 59 | 7  | 50 | 16 | 51 | 114 | 26 | 33 | 34 | 35 |
| 60 | 5  | 17 | 16 | 51 | 115 | 25 | 35 | 34 | 68 |
| 61 | 5  | 16 | 17 | 52 | 116 | 25 | 34 | 35 | 69 |
| 62 | 22 | 16 | 17 | 18 | 117 | 26 | 34 | 35 | 36 |
| 63 | 5  | 16 | 17 | 53 | 118 | 25 | 36 | 35 | 69 |
| 64 | 5  | 18 | 17 | 52 | 119 | 25 | 35 | 36 | 70 |
| 65 | 7  | 52 | 17 | 53 | 120 | 26 | 35 | 36 | 37 |
| 66 | 5  | 18 | 17 | 53 | 121 | 25 | 37 | 36 | 70 |
| 67 | 21 | 17 | 18 | 19 | 122 | 25 | 36 | 37 | 71 |
| 68 | 5  | 17 | 18 | 54 | 123 | 26 | 36 | 37 | 38 |
| 69 | 5  | 17 | 18 | 55 | 124 | 25 | 38 | 37 | 71 |
| 70 | 20 | 19 | 18 | 54 | 125 | 25 | 37 | 38 | 72 |
| 71 | 20 | 19 | 18 | 55 | 126 | 26 | 37 | 38 | 39 |
| 72 | 7  | 54 | 18 | 55 | 127 | 25 | 39 | 38 | 72 |
| 73 | 23 | 18 | 19 | 56 | 128 | 24 | 84 | 39 | 38 |
| 74 | 24 | 18 | 19 | 20 | 129 | 25 | 38 | 39 | 73 |
| 75 | 25 | 20 | 19 | 56 | 130 | 23 | 84 | 39 | 73 |
| 76 | 26 | 19 | 20 | 21 | 131 | 29 | 8  | 42 | 76 |
| 77 | 25 | 19 | 20 | 57 | 132 | 21 | 81 | 78 | 25 |
| 78 | 25 | 21 | 20 | 57 | 133 | 20 | 25 | 78 | 80 |
| 79 | 25 | 20 | 21 | 58 | 134 | 20 | 25 | 78 | 79 |
| 80 | 26 | 20 | 21 | 22 | 135 | 5  | 81 | 78 | 80 |
| 81 | 25 | 22 | 21 | 58 | 136 | 5  | 81 | 78 | 79 |
| 82 | 26 | 21 | 22 | 23 | 137 | 7  | 80 | 78 | 79 |
| 83 | 25 | 21 | 22 | 59 | 138 | 5  | 78 | 81 | 82 |
| 84 | 25 | 23 | 22 | 59 | 139 | 5  | 78 | 81 | 83 |
| 85 | 25 | 22 | 23 | 60 | 140 | 22 | 78 | 81 | 97 |
| 86 | 26 | 22 | 23 | 24 | 141 | 7  | 82 | 81 | 83 |
| 87 | 25 | 24 | 23 | 60 | 142 | 5  | 97 | 81 | 82 |
| 88 | 26 | 23 | 24 | 25 | 143 | 5  | 97 | 81 | 83 |
| 89 | 25 | 23 | 24 | 61 | 144 | 20 | 39 | 84 | 85 |

145 21 87 84 39  
 146 20 39 84 86  
 147 5 87 84 85  
 148 7 85 84 86  
 149 5 87 84 86  
 150 5 84 87 88  
 151 22 84 87 90  
 152 5 84 87 89  
 153 5 90 87 88  
 154 7 88 87 89  
 155 5 90 87 89  
 156 5 87 90 91  
 157 30 87 90 93  
 158 5 87 90 92  
 159 31 91 90 93  
 160 7 91 90 92  
 161 31 92 90 93  
 162 32 90 93 96  
 163 32 90 93 95  
 164 32 90 93 94  
 165 33 96 93 95

166 33 96 93 94  
 167 33 95 93 94  
 168 30 81 97 100  
 169 5 81 97 98  
 170 5 81 97 99  
 171 31 98 97 100  
 172 31 99 97 100  
 173 7 98 97 99  
 174 32 97 100 101  
 175 32 97 100 102  
 176 32 97 100 103  
 177 33 101 100 102  
 178 33 101 100 103  
 179 33 102 100 103  
 180 34 2 104 106  
 181 5 2 104 105  
 182 5 2 104 108  
 183 35 105 104 106  
 184 35 108 104 106  
 185 7 105 104 108  
 186 36 104 106 107

**Dihedrals**

1 1 5 1 3 9  
 2 2 4 1 3 9  
 3 1 6 1 3 9  
 4 1 5 1 4 7  
 5 2 3 1 4 7  
 6 1 6 1 4 7  
 7 3 8 2 104 106  
 8 4 8 2 104 105  
 9 4 8 2 104 108  
 10 5 74 2 104 106  
 11 6 74 2 104 105  
 12 6 74 2 104 108  
 13 5 75 2 104 106  
 14 6 75 2 104 105  
 15 6 75 2 104 108  
 16 7 104 2 8 7  
 17 8 104 2 8 42  
 18 9 104 2 8 43  
 19 10 74 2 8 7  
 20 11 74 2 8 42  
 21 12 74 2 8 43  
 22 10 75 2 8 7  
 23 11 75 2 8 42  
 24 12 75 2 8 43  
 25 13 10 9 3 1  
 26 14 44 9 3 1  
 27 14 45 9 3 1  
 28 14 40 7 4 1  
 29 14 41 7 4 1  
 30 13 8 7 4 1

31 15 4 7 8 2  
 32 16 4 7 8 42  
 33 17 4 7 8 43  
 34 10 40 7 8 2  
 35 11 40 7 8 42  
 36 12 40 7 8 43  
 37 10 41 7 8 2  
 38 11 41 7 8 42  
 39 12 41 7 8 43  
 40 18 2 8 42 76  
 41 18 7 8 42 76  
 42 19 43 8 42 76  
 43 20 3 9 10 12  
 44 15 3 9 10 11  
 45 17 3 9 10 77  
 46 21 44 9 10 12  
 47 10 44 9 10 11  
 48 12 44 9 10 77  
 49 21 45 9 10 12  
 50 10 45 9 10 11  
 51 12 45 9 10 77  
 52 22 14 12 10 9  
 53 22 14 12 10 11  
 54 23 14 12 10 77  
 55 15 26 11 10 9  
 56 10 47 11 10 9  
 57 10 46 11 10 9  
 58 20 26 11 10 12  
 59 21 47 11 10 12  
 60 21 46 11 10 12  
 61 17 26 11 10 77  
 62 12 47 11 10 77

|     |    |    |    |    |    |     |    |    |    |    |    |
|-----|----|----|----|----|----|-----|----|----|----|----|----|
| 63  | 12 | 46 | 11 | 10 | 77 | 118 | 40 | 23 | 22 | 21 | 58 |
| 64  | 24 | 10 | 11 | 26 | 28 | 119 | 41 | 58 | 21 | 22 | 59 |
| 65  | 25 | 47 | 11 | 26 | 28 | 120 | 40 | 21 | 22 | 23 | 60 |
| 66  | 25 | 46 | 11 | 26 | 28 | 121 | 42 | 21 | 22 | 23 | 24 |
| 67  | 26 | 10 | 12 | 14 | 13 | 122 | 41 | 59 | 22 | 23 | 60 |
| 68  | 27 | 10 | 12 | 14 | 15 | 123 | 40 | 24 | 23 | 22 | 59 |
| 69  | 28 | 49 | 15 | 14 | 12 | 124 | 42 | 22 | 23 | 24 | 25 |
| 70  | 29 | 16 | 15 | 14 | 12 | 125 | 40 | 22 | 23 | 24 | 61 |
| 71  | 28 | 48 | 15 | 14 | 12 | 126 | 40 | 25 | 24 | 23 | 60 |
| 72  | 28 | 49 | 15 | 14 | 13 | 127 | 41 | 60 | 23 | 24 | 61 |
| 73  | 29 | 16 | 15 | 14 | 13 | 128 | 40 | 23 | 24 | 25 | 62 |
| 74  | 28 | 48 | 15 | 14 | 13 | 129 | 38 | 78 | 25 | 24 | 23 |
| 75  | 30 | 14 | 15 | 16 | 50 | 130 | 41 | 61 | 24 | 25 | 62 |
| 76  | 31 | 17 | 16 | 15 | 14 | 131 | 39 | 78 | 25 | 24 | 61 |
| 77  | 30 | 14 | 15 | 16 | 51 | 132 | 35 | 81 | 78 | 25 | 24 |
| 78  | 6  | 49 | 15 | 16 | 50 | 133 | 37 | 80 | 78 | 25 | 24 |
| 79  | 32 | 17 | 16 | 15 | 49 | 134 | 37 | 79 | 78 | 25 | 24 |
| 80  | 6  | 49 | 15 | 16 | 51 | 135 | 34 | 81 | 78 | 25 | 62 |
| 81  | 6  | 48 | 15 | 16 | 50 | 136 | 36 | 80 | 78 | 25 | 62 |
| 82  | 32 | 17 | 16 | 15 | 48 | 137 | 36 | 79 | 78 | 25 | 62 |
| 83  | 6  | 48 | 15 | 16 | 51 | 138 | 43 | 11 | 26 | 28 | 27 |
| 84  | 32 | 15 | 16 | 17 | 52 | 139 | 44 | 11 | 26 | 28 | 29 |
| 85  | 33 | 15 | 16 | 17 | 18 | 140 | 45 | 26 | 28 | 29 | 63 |
| 86  | 32 | 15 | 16 | 17 | 53 | 141 | 46 | 26 | 28 | 29 | 30 |
| 87  | 6  | 50 | 16 | 17 | 52 | 142 | 45 | 27 | 28 | 29 | 63 |
| 88  | 32 | 18 | 17 | 16 | 50 | 143 | 46 | 27 | 28 | 29 | 30 |
| 89  | 6  | 50 | 16 | 17 | 53 | 144 | 40 | 28 | 29 | 30 | 64 |
| 90  | 6  | 51 | 16 | 17 | 52 | 145 | 42 | 28 | 29 | 30 | 31 |
| 91  | 32 | 18 | 17 | 16 | 51 | 146 | 41 | 63 | 29 | 30 | 64 |
| 92  | 6  | 51 | 16 | 17 | 53 | 147 | 40 | 31 | 30 | 29 | 63 |
| 93  | 31 | 16 | 17 | 18 | 19 | 148 | 40 | 29 | 30 | 31 | 65 |
| 94  | 32 | 16 | 17 | 18 | 54 | 149 | 42 | 29 | 30 | 31 | 32 |
| 95  | 32 | 16 | 17 | 18 | 55 | 150 | 41 | 64 | 30 | 31 | 65 |
| 96  | 30 | 19 | 18 | 17 | 52 | 151 | 40 | 32 | 31 | 30 | 64 |
| 97  | 6  | 52 | 17 | 18 | 54 | 152 | 40 | 30 | 31 | 32 | 66 |
| 98  | 6  | 52 | 17 | 18 | 55 | 153 | 42 | 30 | 31 | 32 | 33 |
| 99  | 30 | 19 | 18 | 17 | 53 | 154 | 41 | 65 | 31 | 32 | 66 |
| 100 | 6  | 53 | 17 | 18 | 54 | 155 | 40 | 33 | 32 | 31 | 65 |
| 101 | 6  | 53 | 17 | 18 | 55 | 156 | 40 | 31 | 32 | 33 | 67 |
| 102 | 34 | 17 | 18 | 19 | 56 | 157 | 42 | 31 | 32 | 33 | 34 |
| 103 | 35 | 17 | 18 | 19 | 20 | 158 | 41 | 66 | 32 | 33 | 67 |
| 104 | 36 | 54 | 18 | 19 | 56 | 159 | 40 | 34 | 33 | 32 | 66 |
| 105 | 37 | 54 | 18 | 19 | 20 | 160 | 40 | 32 | 33 | 34 | 68 |
| 106 | 36 | 55 | 18 | 19 | 56 | 161 | 42 | 32 | 33 | 34 | 35 |
| 107 | 37 | 55 | 18 | 19 | 20 | 162 | 41 | 67 | 33 | 34 | 68 |
| 108 | 38 | 18 | 19 | 20 | 21 | 163 | 40 | 35 | 34 | 33 | 67 |
| 109 | 39 | 18 | 19 | 20 | 57 | 164 | 40 | 33 | 34 | 35 | 69 |
| 110 | 40 | 21 | 20 | 19 | 56 | 165 | 42 | 33 | 34 | 35 | 36 |
| 111 | 41 | 56 | 19 | 20 | 57 | 166 | 41 | 68 | 34 | 35 | 69 |
| 112 | 40 | 19 | 20 | 21 | 58 | 167 | 40 | 36 | 35 | 34 | 68 |
| 113 | 42 | 19 | 20 | 21 | 22 | 168 | 40 | 34 | 35 | 36 | 70 |
| 114 | 41 | 57 | 20 | 21 | 58 | 169 | 42 | 34 | 35 | 36 | 37 |
| 115 | 40 | 22 | 21 | 20 | 57 | 170 | 41 | 69 | 35 | 36 | 70 |
| 116 | 42 | 20 | 21 | 22 | 23 | 171 | 40 | 37 | 36 | 35 | 69 |
| 117 | 40 | 20 | 21 | 22 | 59 | 172 | 40 | 35 | 36 | 37 | 71 |

173 42 35 36 37 38  
174 41 70 36 37 71  
175 40 38 37 36 70  
176 40 36 37 38 72  
177 42 36 37 38 39  
178 41 71 37 38 72  
179 40 39 38 37 71  
180 38 84 39 38 37  
181 40 37 38 39 73  
182 39 84 39 38 72  
183 41 72 38 39 73  
184 37 85 84 39 38  
185 35 87 84 39 38  
186 37 86 84 39 38  
187 36 85 84 39 73  
188 34 87 84 39 73  
189 36 86 84 39 73  
190 30 25 78 81 82  
191 30 25 78 81 83  
192 31 97 81 78 25  
193 6 80 78 81 82  
194 6 80 78 81 83  
195 32 97 81 78 80  
196 6 79 78 81 82  
197 6 79 78 81 83  
198 32 97 81 78 79  
199 47 78 81 97 100  
200 32 78 81 97 98  
201 32 78 81 97 99  
202 48 82 81 97 100  
203 6 82 81 97 98  
204 6 82 81 97 99  
205 48 83 81 97 100  
206 6 83 81 97 98  
207 6 83 81 97 99  
208 30 39 84 87 88  
209 31 90 87 84 39  
210 30 39 84 87 89  
211 6 85 84 87 88

212 32 90 87 84 85  
213 6 85 84 87 89  
214 6 86 84 87 88  
215 32 90 87 84 86  
216 6 86 84 87 89  
217 32 84 87 90 91  
218 47 84 87 90 93  
219 32 84 87 90 92  
220 6 88 87 90 91  
221 48 88 87 90 93  
222 6 88 87 90 92  
223 6 89 87 90 91  
224 48 89 87 90 93  
225 6 89 87 90 92  
226 49 87 90 93 96  
227 49 87 90 93 95  
228 49 87 90 93 94  
229 50 91 90 93 96  
230 50 91 90 93 95  
231 50 91 90 93 94  
232 50 92 90 93 96  
233 50 92 90 93 95  
234 50 92 90 93 94  
235 49 81 97 100 101  
236 49 81 97 100 102  
237 49 81 97 100 103  
238 50 98 97 100 101  
239 50 98 97 100 102  
240 50 98 97 100 103  
241 50 99 97 100 101  
242 50 99 97 100 102  
243 50 99 97 100 103  
244 51 2 104 106 107  
245 52 105 104 106 107  
246 52 108 104 106 107

**Table S4.** Summary of thermodynamic parameter changes from Figure S4.

| Parameter                                             | 10% - 30% <i>Calix6</i>                                                                                                                                                                                                                                                                                                                                                                                               | 50% - 70% <i>Calix 6</i>                                                                                                                                                                                                                                                                                                                     | -90% <i>Calix 6</i>                                                                                                                                                                                                                                                                                                                                                                                                                              |
|-------------------------------------------------------|-----------------------------------------------------------------------------------------------------------------------------------------------------------------------------------------------------------------------------------------------------------------------------------------------------------------------------------------------------------------------------------------------------------------------|----------------------------------------------------------------------------------------------------------------------------------------------------------------------------------------------------------------------------------------------------------------------------------------------------------------------------------------------|--------------------------------------------------------------------------------------------------------------------------------------------------------------------------------------------------------------------------------------------------------------------------------------------------------------------------------------------------------------------------------------------------------------------------------------------------|
| $\omega, I_p$                                         | <p>At all <math>\pi</math> values, <math>\omega, I_p &lt; 0</math> indicating attractive molecular interactions.</p> <p>Values become more negative with increasing pressure due to increasing impact of the intermolecular interactions when the film is more densely packed.</p> <p>For any given pressure, the most negative value is found for 10% <i>Calix6</i>, evidence of strong favourable interactions.</p> | <p>At low <math>\pi</math>, <math>\omega, I_p &gt; 0</math> indicating repulsive interactions</p> <p>At high <math>\pi</math>, <math>\omega &lt; 0</math> attributed to a thermodynamic instability of the monolayer (expulsion of <i>Calix6</i>).</p>                                                                                       | <p>Same as 50% <i>Calix6</i>, except that as % <i>Calix6</i> increases, the pressure at which <math>\omega, I_p</math> become negative increases.</p>                                                                                                                                                                                                                                                                                            |
| $f_1 = f_{DPPG}$ (effect of <i>Calix6</i> on DPPG)    | <p><math>f_{DPPG}</math> close to 1 but deviate (decrease) slightly as <math>\pi</math> increases = no impact on DPPG.</p>                                                                                                                                                                                                                                                                                            | <p><math>f_{DPPG}</math> still relatively close to 1 = little impact on DPPG for <math>\pi &lt; 30 \text{ mN m}^{-1}</math>; deviation increases at high <math>\pi</math> attributed to expulsion of <i>Calix6</i></p>                                                                                                                       | <p>Strong deviations from ideality. For <math>\pi \leq 25 \text{ mN m}^{-1}</math>, <math>f_{DPPG} &gt; 1</math> indicating repulsive interactions, i.e. DPPG:DPPG interactions are favored instead of DPPG:<i>Calix6</i>, especially at low <math>\pi</math>. For <math>\pi = 30 \text{ mN m}^{-1}</math>, <math>f_1</math> is significantly lower than 1 due to expulsion of <i>Calix6</i> from the monolayer inducing a film contraction.</p> |
| $f_2 = f_{Calix6}$ (effect of DPPG on <i>Calix6</i> ) | <p><math>f_2</math> is less than 1, and decreases significantly with increasing surface pressure. This behavior indicates that the attractive DPPG:<i>Calix6</i> interactions are stronger than <i>Calix6</i>:<i>Calix6</i>.</p>                                                                                                                                                                                      | <p>By increasing the <i>Calix6</i> molar ratio in the mixed monolayer, <math>f_2</math> values are close to 1, indicating that there is no difference between the DPPG:<i>Calix6</i>, DPPG:DPPG and <i>Calix6</i>:<i>Calix6</i> interactions. Only at <math>30 \text{ mN m}^{-1}</math> is there significant deviation due to expulsion.</p> |                                                                                                                                                                                                                                                                                                                                                                                                                                                  |

## References

- 1 J. M. García-Antón, F. Reig, A. Messeguer, F. Comelles, M. Espina and M. A. Alsina, *Colloid Polym. Sci.*, 2013, **291**, 1065-1075.
- 2 G. L. Gaines, *Insoluble Monolayers at Liquid/Gas Interfaces*, Wiley-Interscience, New York, 1966.
- 3 S. Nagadome, N. S. Suzuki, Y. Mine, T. Yamaguchi, H. Nakahara, O. Shibata, C. Chang and G. Sugihara, *Colloids Surf., B*, 2007, **58**, 121–136.
- 4 G. He, R. Sun, C. Hao, J. Yang, M. Wang and L. Zhang, *Colloids Surf., A*, 2014, **441**, 184–194.
- 5 C. Hao, R. Sun, J. Zhang, Y. Chang and C. Niu, *Colloids Surf., B*, 2009, **69**, 201–206.
- 6 J. Alejandro, G. A. Chapela, F. Bresme and J-P. Hansen, *J. Chem. Phys.*, 2009, **130**, 174505-174510.
- 7 J. Jiang, J. B. Klauda and S. I. Sandler, *J. Phys. Chem. B*, 2004, **108**, 9852-9860.
- 8 L. S. de Lara, E. C. Wrobel, M. Lazzarotto, S. R. de Lázaro, A. Camilo Jr. and K. Wohnrath, *Phys. Chem. Chem. Phys.*, 2016, **18**, 22906-22913.
- 9 P. Kane, D. Fayne, D. Diamond, S. E. J. Bell and M. A. McKervey, *J. Mol. Model.*, 1998, **4**, 259-267.
- 10 A. Van der Heyden, J. B. Regnouf-de-Vains, P. Warszynski, J. O. Dalbavie, A. Zywockinski and E. Rogalska, *Langmuir*, 2002, **18**, 8854-8861.
- 11 S. S. Jang, S-T. Lin, P. K. Maiti, M. Blanco, W. A. Goddard, P. Shuler and Y. Tang, *J. Phys. Chem. B*, 2004, **108**, 12130-12140.
- 12 R. W. Hockney and J. W. Eastwood, *Computer Simulation Using Particles*, Taylor & Francis, Bristol, USA, 1988.
- 13 A. P. Thompson, S. J. Plimpton and W. Mattson, *J. Chem. Phys.*, 2009, **131**, 154107-154112.
